# Supplementary material for: Hypoxia disaster in waters adjacent to the Changjiang estuary
Source: Copernicus journal article supplement (doi:10.5194/nhess-2016-59), 2016-04-28
Supplement: Supplementary file [file nhess-2016-59-AC2-supplement.pdf]

## Response to Review

We thank both reviews for very constrictive comments and suggestions. These are very helpful in guiding our revisions of the manuscript. We make the efforts to thoroughly revise in order to improve the presentation of our data analysis and the interpretation of results. A point-to-point response to  
5 comments is provided below. Reviewers' comments are in blue font and our response is in black font. Please also note that we have changed the title of this manuscript to "On influencing factors of hypoxia in waters adjacent to the Changjiang estuary" and added an additional author (Youyu Lu).

### Reviewer 1:

10 The manuscript is based on a series of hydrological surveys in the region adjacent and offshore the Changjiang estuary, an area that suffers from frequent hypoxia/anoxia episodes. The background information, provided by the Authors in the introductory part of the manuscript, inform the reader that hypoxia development is due to the classical triggering factors: enhanced vertical stratification and organic matter accumulation and remineralisation in the lower water column, but they state that the timing of the hypoxia onset, as well as the location of the main hypoxia center is determined by the interplay  
15 between the water masses of the region. The main effort of the paper is about an effort to define the spatial and temporal hydrological characteristics underlying development of the hypoxia events as well as their location. I have to say that despite the rich and extensive dataset assembled, the effort is not successful because of a rather confusing analysis and description of the data collected. Therefore, I do not recommend the publication of the manuscript in its present form. Below I list a series of remarks that hopefully the authors might consider in addressing the very serious major revision that the manuscript needs in order to be considered for publication in future.

20 We thank this reviewer for the very critical review that points out the weakness in our analysis. The detailed comments are fully considered in our revision. (See our response below)

1) The manuscript reads very much as a technical report rather than as a scientific paper. There is a long description of the paper figures that unfortunately does not help very much the reader to understand the following considerations.

25 Following the reviewer's comment, we have made significant effort to simply description of observational data (figures) and enhance the statistical analysis and interpretation.

30 2) The hydrology of the region (Water mass distribution and pathways of the main currents) is described by means of a qualitative cartoon only. However, in the following the distribution of the observed hydrological properties (T S and DO) is related to specific water masses. Unfortunately the reader not knowledgeable with the oceanographic characteristics of the region, cannot fully understand and assess the dependence of the hypoxia onset and location on the basis of the changing hydrology. It is therefore strongly recommended that the authors define more strictly the hydrological properties of the water masses involved in the hypoxia dynamics of the region (the large quantity of data they collected should enable them to provide (for instance) T-S diagram whose analysis can help to define in a quantitative way the interplay among water masses. Also the use of T-DO and/or S-DO diagrams could greatly help the analysis and the considerations about hypoxia timing and location.

35 Following this very insightful and constructive suggestion from the reviewer, we have made substantial effort to improve the analysis of relationship between water mass and DO distributions. First, Figure 1 has been revised to denote the major branches of summer circulation that contribute to the shaping of hydrologic conditions in the region. We divide the focused study area into regions I and II, to simplify the description in the main text and ease the appreciation by a reader who is unfamiliar with the regional oceanography. We further add a new Figure 9 to explore the variations of DO with respect to T, S and  $N^2$ . These new diagrams show clear grouping of observational data into various major water masses in the study region. Finally, the revised new Figure 10 (formerly Figure 9) illustrates the seasonal evolution of DO in region I corresponding to the changing stratification condition.

45 3) The figure accompanying the manuscript are very poor and confusing. Again the large quantity of data they collected should deserve a better analysis, based (for instance) on an objective analysis procedure, who would allow the author to define better the location of the water masses. From a formal point of view the combined use of isolines and “colored” dots is adding confusion.

The new Figure 9 and revised Figure 10 present objective analyses of the large quantify of data following the suggestion of the reviewer. In Figures 3 and 5-8, the presentation of both color dots and isolines is kept to ease the recognition of spatial gradients by a reader.

50 4) As it is now it is very much difficult to relate the main conclusion of the paper with the data described and analysed earlier. This is due, as stated above, to the poor treatment of the data and the generic analysis procedure.

After a major revision following the comments and suggestions, we hope that the connection between our analysis and conclusion is more explicit. We thank the reviewer again for the time spent on our manuscript.

55

Reviewer 2:

60 Based on a new and extensive dataset (cruises) the authors intent to relate the dynamics of hypoxic area (formation, spatial distribution, timing) in the Changjiang Estuary to local hydrodynamics features. The strong hypoxic event documented highlights the scientific relevance of the issue. The most important conclusion is that the interannual variability of hypoxic events in this region is primarily driven by physical processes rather than riverine run off or nutrient input (see comparison with Gulf of Mexico in Sect 4.4) and the details provided for this control. The authors details those physical process for two distinct regions, i.e 1. the southern estuary, where hypoxia is avoided in cases of Kuroshio Subsurface water northward extension and 2. the Changjiang Bank (or northern estuary) where hypoxia occurrence is related to persistent (haline) stratification triggered by the westward spreading of Changjiang diluted waters. Those conclusions are well supported by the summarizing Fig. 9. and form a understanding basis for a more extensive reading of local datasets. The analysis is well documented and instructed, in the sense that observations are described and discussed in the lights of know dynamics of the region rather than passed through automatic statistical procedures. In my view this is positive given the complexity of local circulation features. The abstract gives a clear summary of the results and conclusions. I advise the publication of this manuscript, after considering of the few minor revisions listed below.

70 The reviewer provides concise summary of our study and we greatly appreciate the very encouraging comments. Following the reviews of this and the other reviewer, we have significantly revised the manuscript through improving presentation and analysis. We hope the reviewer find the revised manuscript satisfactory.

Major comments.

75 Sect 4.4 I think the discussion should include comments on the different timescales considered. Biogeochemical and physical drivers does not play on the interannual variability of hypoxia occurrences at the same time scales. Another issue is that the gulf of Mexico and the East China Sea differ by their openness, which might changes the relative importance of physical and biogeochemical drivers.

Thank you for the suggestion. In the revised section 4.4, we have added discussions on interannual variation of hypoxia and the distinction between the Gulf of Mexico and the East China Sea in terms of the potential influence of their openness.

80 Minor Comments.

L62. "the influence of pycnocline on the spatial variation of hypoxia" -> the relationship between the pycnocline ?location? and spatial variation of hypoxia ?

This sentence is changed to "Zhu et al. (2015) emphasized the occurrence of hypoxia related to the presence of pycnocline".

L70 extra space in "t hat"

85 Revised.

L73 Can you give reference for the blocking of oxygen exchanges by ocean eddies? if not, remove.

We have removed the mentioning of eddies.

L103 senor -> sensor

Revised.

90 L111 references needed for the "investigation standards"

A reference has been added.

L112 phycnocline -> pycnocline

Revised.

L148. Either "reached 30m at station K3", or "reached 20-30 m from stations K2 to K6"

95 This sentence has been rephrased as 'the thickness of the hypoxia water column reached 20-30 m from stations K2 to K6,...'.

L166.and Fig 8 can you give more references or the method used to locate the frontal zone.

More references related to the tidal fronts have been added in Section 2.

L172 oxygenate aeration -> oxygenation or ventilation

Revised.

100 L176. Reference for characteristic oxygen concentrations of the KSW.

The related references have been added. We re-check the references and revised the characteristic oxygen concentrations of the KSW to be about 5.0-6.0 mg L<sup>-1</sup>.

L184 Tsushima strait is not on the map Fig1.

Thanks. It is now on the revised Fig 1.

105 L191. "was consistent"

Revised.

L201 rephrase "the persistence of stratification was insufficient for oxygen consumption"

This sentence has been changed to 'In May, the cumulative oxygen consumption was insufficient to cause low values of DO, despite of the development of stratification,'

110 L204 "DO was rapidly consumed" -> "was rapidly depleted".

Revised.

L216 rephrase: "The absence of DO-rich water input from upstream led to .."

Revised.

L217 "rest" -> "other"

115 Revised.

L243 remove the uppercase from Log and put N2 inside ()

Revised.

L259 "was far more less" -> "was lower by far"

Revised.

120 L273 needs -> requires

Revised.

L286 remove "of"

Revised.

L296 involve -> evolve

125 Revised.

L305 last sentence has to be rephrased to something like "Our conclusions could support the prediction of hypoxia based on the evolution of bottom and surface salinity"

The last sentence has been changed to 'We hope that combining analyses of observational data and modelling results shall eventually lead to better prediction of the spatial and temporal variations of hypoxia.'

130 References : Chen et al is 1988 on L.29 and 1998 in the references; Zhao et al 1985 not referred to in the manuscript.

Revised. Thank the reviewer again for the very critical review.

135

# On influencing factors of hypoxia in waters adjacent to the Changjiang estuary

Xiaofan Luo<sup>1</sup>, Hao Wei<sup>2</sup>, Renfu Fan<sup>2</sup>, Zhe Liu<sup>1</sup>, Liang Zhao<sup>1</sup>, Youyu Lu<sup>3</sup>

<sup>1</sup> College of Marine Science and Engineering, Tianjin University of Science & Technology, Tianjin, 300457, China

140 <sup>2</sup> School of Marine Science and Technology, Tianjin University, Nankai District, Tianjin, 300072, China

<sup>3</sup> Ocean Sciences Division, Department of Fisheries and Oceans, Bedford Institute of Oceanography, Dartmouth, Nova Scotia, B2Y 4A2, Canada

*Correspondence to:* Hao Wei ([weihao@ouc.edu.cn](mailto:weihao@ouc.edu.cn))

*\*These authors contributed equally to this work and should be considered co-first authors.*

145

**Abstract.** Based on observational data from ten cruises carried out in 2012 and 2013, the distribution of dissolved oxygen (DO) and hypoxia ( $DO < 2.0 \text{ mg L}^{-1}$ ) evolution in waters adjacent to the Changjiang estuary are studied. The linkage between summer hypoxia and hydrodynamic conditions is explored. The results suggest that hypoxia frequently occurred from June to October to the south of the Changjiang estuary near the 30-50 m isobaths and was prone to happen under strong stratification without the presence of the Kuroshio Subsurface Water (KSW). Over the Changjiang Bank, hypoxia mainly occurred in July, August and September. Low-oxygen areas initially appear under strong stratification induced by the spreading of the Changjiang Diluted Water (CDW), and develop into hypoxia centers due to the lack of supplement of the relatively DO-rich Yellow Sea Water and the KSW. The evolution of hypoxia in a year is influenced by conditions of the shelf circulation especially the paths of the KSW and the CDW. Thus, further study on the salinity evolution in the bottom layer of the water to the south of the Changjiang estuary and in the surface layer over the Changjiang Bank, that indicates the extensions of the KSW and the CDW, is needed for improving the hypoxia prediction.

150

155

## 1 Introduction

Most species of marine living depend on dissolved oxygen (DO) in the water and are threatened by low concentration of DO (i.e.,  $< 3.0 \text{ mg L}^{-1}$ ). In coastal waters, increasing occurrence of extremely low DO concentration, i.e. hypoxia ( $DO < 2.0 \text{ mg L}^{-1}$ ), is becoming a global environmental issue (Diaz and Rosenberg, 2008; Conley et al., 2009). One of the main goals of regional environment management is to monitor and control the area and volume of hypoxia, and this requires understanding and prediction of low-oxygen evolution (Feng et al., 2012). It is generally agreed that stratification and organic matter degradation are main reasons for the formation of hypoxia. Stratification is influenced by various physical processes. For hypoxia in estuarine regions, there have been continuous debates on the roles played by the riverine nutrient loads and

160

165 freshwater discharge (Bianchi et al., 2010).

Since the middle of last century, seasonal survey has revealed the occurrence of hypoxia in the lower water column adjacent to the Changjiang estuary an area with a high primary production on the shelf of East China Sea (ECS) (Fig. 1) (Gu, 1980; Chen et al., 1988; Tian et al., 1993; Zhao et al., 2001). However, hypoxia was not identified as an important factor affecting the ecosystem in this region until the study carried out by the Chinese GLOBEC (Global Ocean Ecosystem Dynamics) project in the summer of 1999 (Li et al., 2002). Subsequently, summer hypoxia in this region has been continuously reported based on sparse ship-based (Shi et al., 2006a; Wei et al., 2007; Wang, 2009). Currently, the Changjiang estuary has been regarded as one of the largest coastal hypoxia areas in the world (Chen et al., 2007).

A completed picture of the spatial and temporal variations of DO concentration adjacent to the Changjiang estuary has started to emerge based on analysis of observation data collected so far. From May to October in 2006, intense observations were made in this region by various research teams (Zhang et al., 2007; Zhou et al., 2010; Li et al., 2011; Wei et al., 2011; Wang et al., 2012). The synthesis of analyzing observations revealed that in 2006, low-oxygen center did not appear in May but existed in June in waters along the coast to the south of the Changjiang estuary. In July, a hypoxia center firstly appeared in the western part of the Changjiang Bank, and then in August, two hypoxia centers appeared to the north and south of the Changjiang estuary, with the one in the north being more severe. In September and October, the hypoxia center existed to the south of the Changjiang estuary. Data from the monthly survey from September of 1958 to September of 1959 was recently re-analyzed (Liu et al., 2012). It was found that the low-oxygen center appeared to the south of the estuary in May and June, appeared near the estuary in July and August, and re-appeared to the south of the estuary in September. This evolution of the low-oxygen center showed correspondence with the extension of the Taiwan Warm Current (TWC) which consists of Taiwan Strait water in the upper layer and the Kuroshio Subsurface Water (KSW) in the lower layer. The lowest DO value was 0.34 mg L<sup>-1</sup> in August of 1959, a highly severe hypoxia but did not draw much attention for about 40 years.

Generally, the formation of hypoxia is related to high rate of primary production, long resident time of bottom water, persistent presence of stratification and specific bathymetry of continental shelf (Rabouille et al., 2008). For hypoxia in the waters adjacent to the Changjiang estuary, previous studies have identified the important roles played by the pycnocline between the freshwater from river discharge and the upwelled water from the TWC, and the abundant bottom detritus from surface phytoplankton blooms (Li et al., 2002; Zhang et al., 2007). However, the presence of pycnocline and mounting detritus does not always correspond to the existence of hypoxia, nor can it explain the evolution of the spatial distribution of hypoxia. Zhou et al. (2010) analyzed the observed bottom DO, water temperature and salinity in waters adjacent to the Changjiang estuary in June, August, October of 2006, and made comparison with observational data in August of 1998 and 1999. They concluded that the temporal evolution of hypoxia is mainly caused by the spatial structure of water mass. Based on observations in 2006, Wei et al. (2011) suggested that the northward spreading of hypoxia was caused by eutrophication off the Changjiang estuary, intensification of the TWC, and the northward shift of the upwelling region. Based on analysis of

200 observed bottom DO distributions in January and in each month from April to November in 2006, Wang et al. (2012) concluded that the location of hypoxia center was controlled by stratification and the northward expansion of the TWC. Zhang et al. (2012) suggested that stratification caused by the Changjiang Diluted Water (CDW, fresh water from river discharge) was the main reason for hypoxia formation while the water advected from the Yellow Sea (YS) could weaken hypoxia; the competition of the two processes induced the spatial and temporal variations of bottom DO concentration. Based on observations from June to August, and October in 2006 and from August to September in 2009, Zhu et al. (2015) emphasized the occurrence of hypoxia related to the presence of pycnocline. Through combining reanalysis of data from 2006 to 2007 with results of an ocean circulation model, Wei et al. (2015b) noted possible influence of seasonal circulation  
205 condition on the position of hypoxia in regions adjacent to the Changjiang estuary.

Previous studies have reached a consensus that the movement of water masses and changes of stratification induced by ocean circulation variations are all responsible for the formation and development of hypoxia. However, there lacks agreement on which factor, among the TWC, the CDW, fronts and the Yellow Sea Water (YSW), plays the dominant role. It is possible that each previous study captured one aspect of hypoxia formation and evolution in a specific area, but the  
210 conclusion was limited by the particular dataset analyzed. For instance, the hypoxia center in summer of 2006 was located at a northern position relative to 1959, but did this northward shift occur frequently in recent years? Is it generally true that from beginning to the end of summer, the hypoxia center appeared successively at the southern, northern, then back to southern locations? What is the exact evolution of hypoxia from formation to decay? Besides the blocking of oxygen exchange by stratification and fronts, how are DO distribution and hypoxia evolution influenced by the TWC accompanied  
215 with the KSW? What role does the YSW play?

From a synthesis of observations of hypoxia reported in literatures and made within the recent decade (Fig. 1 and Table 1), significant year-to-year variations in the location and evolution of hypoxia can be identified. This study attempts to further explore the influence of changes in hydrodynamic condition on the evolution of hypoxia through analyzing new observations carried out in June, August and October in 2012 and monthly from May to September in 2013. According to  
220 hydrodynamic condition and topography features, we divide the waters adjacent to the Changjiang estuary into two regions (Fig.1). Region I covers the fairly flat Changjiang Bank with depths less than 50 m. Region II covers the region to the south of the Changjiang estuary including a steep slope approximately between 30-50 m isobaths, the submarine river canyon and part of the middle shelf of the ECS with depths between 50-100 m. The low-oxygen/hypoxia centers in the two years will be mapped out from the observed bottom DO distribution. Distributions of stratification and hydrography will be described. By  
225 linking the DO distribution to variations of hydrodynamic condition, we analyze the relative contributions of the TWC, the CDW and the YS tidal front in the two regions, with a special attention paid on the influence of the lateral advection of the KSW.

## **2 Field observations and data processing**



Concentrations of DO and hydrographic data are obtained from 10 cruises carried out in June, August and October in 2012, and monthly from May to September in 2013 (Table 2). The data for May and July in 2013 is a merge of observations made from two ships in each month. RBR 620-CTD with Seapoint sensor of DO was used in all the 10 cruises to measure profiles of water temperature, salinity, DO concentration. SBE-CTD was deployed in 8 cruises excluding the survey in May of 2013 to the north of the Changjiang estuary and that in July of 2013 in the estuary. When both RBR 620-CTD and SBE-CTD took measurements, the profiles of water temperature and salinity from SBE-CTD were used because of the higher sampling frequency and precision of this instrument.

Data recorded during descending profiling are used. For each profile, the inverse pressure calibration was applied and spikes were removed as the basic data quality control. For each cruise that covered the whole observational grids, about 100 water samples were taken from surface, middle and bottom layers. Salinity of these samples was measured by the SYA2-2 salinometer in laboratory to calibrate the salinity from the CTD measurement in each cruise. The DO sensor on RBR620-CTD was calibrated prior to each cruise as the following. It was firstly put into pure water aerated by oxygenate pump for 60 minutes to get the voltage for DO reaching 100 % saturation, and was then put into the anoxia water (i.e., saturated sodium sulfite solution) to get the voltage for zero DO reading. The DO concentration was determined according to the linear scaling between these two voltages. During some cruises, the chemistry group also used the Winkler Titration method to measure the DO of water samples from different layers at selected stations. This enabled an alternative calibration of the DO measured by the DO sensor. Data was sampled at high frequencies, for instance, 24 Hz for the SBE-CTD and 8 Hz for the RBR-620 CTD. The raw data was averaged over 0.2 m vertical intervals. The buoyant frequency ( $N^2$ ) was calculated from water temperature and salinity. The maximum  $N^2$  in a profile was used to represent the stratification intensity of the water column at a particular station.

Stations to the south of 33° N are chosen for analyzing hypoxia in water adjacent to the Changjiang estuary (Fig. 1). Sampling grids for each cruise and sections to be discussed in following sections are shown in Fig. 2. According to Su et al. (1996), salinity can be used to identify water mass in the ECS, i.e.,  $S < 30.0$  representing the diluted water,  $S > 34.0$  for the TWC water that includes the KSW with  $S > 34.5$ . In general, the 17.0 °C isothermal can be as the boundary between the YS cold water and its surrounding water (Mao et al., 1964). Thus, we take the area with bottom temperature in the range of 13.0-17.0 °C to represent the summer tidal front of the YS (Zhao, 1985). According to China's 1992 National Marine Investigation Standard by the State Bureau of Technical Supervision (the State Bureau of Technical Supervision, 1992), the pycnocline is defined to exist if the vertical gradient of density is larger than  $0.1 \text{ kg m}^{-4}$  for the water depth less than 200 m. This equals to the maximum  $N^2$  of a vertical profile larger than  $1.0 \times 10^{-3.0} \text{ s}^{-2}$  ( $N^2$  is used to denote the maximum  $N^2$  of a vertical profile in the following).

### 3. Bottom DO concentration observed in 2012 and 2013

260 **3.1. June, August and October, 2012**

There was no hypoxia in June of 2012 (Fig. 3a). The bottom DO concentration was larger than  $4.0 \text{ mg L}^{-1}$ , with higher values in the eastern part and lower values in the western part of survey area. A band of relatively low DO concentration of  $4.0\text{-}5.0 \text{ mg L}^{-1}$  was found along the 30 m isobath to the north of  $29^\circ \text{ N}$ .

265 In August (Fig. 3b), the DO concentration was  $2.0\text{-}3.0 \text{ mg L}^{-1}$  lower than that in June. There were only a few stations located in Region II. Over the western side of Region I,  $\text{DO} < 3.0 \text{ mg L}^{-1}$  was observed. A hypoxia center with  $\text{DO} = 1.0 \text{ mg L}^{-1}$  appeared in the northwestern survey field (station II, at  $33^\circ \text{ N}$ ,  $122.5^\circ \text{ E}$ ).

In October, the DO concentration of bottom water was elevated (Fig. 3c). In Region II, two centers of relatively low-oxygen were present. These two centers were located near the northern end of the submarine river canyon with  $\text{DO} = 4.8 \text{ mg L}^{-1}$  (station PN1), and the steep slope with  $\text{DO} < 4.0 \text{ mg L}^{-1}$ , about  $2.0 \text{ mg L}^{-1}$  lower than that in the surrounding waters.

270 Overall, in summer of 2012 hypoxia off the Changjiang estuary was not severe. There was no hypoxia in June and October though low-oxygen centers existed. The hypoxia center was located in Region I in August.

**3.2. May - September, 2013**

In May, the vertical and horizontal distributions of DO were fairly homogenous (Fig. 3d, vertical distribution was not shown). DO values were  $8.0\text{-}9.0 \text{ mg L}^{-1}$  in the near shore region and  $7.0\text{-}8.0 \text{ mg L}^{-1}$  in the offshore region. The minimum DO value, located at station kb, was  $6.7 \text{ mg L}^{-1}$ .

280 In June, DO values at most stations in Region I were less than  $5.0 \text{ mg L}^{-1}$  (Fig. 3e). In Region II, DO was lower than  $4.0 \text{ mg L}^{-1}$  and a hypoxia center appeared near the slope between the 30-50 m isobaths. Along the  $122.5^\circ \text{ E}$  section (black lines in Fig. 2a, e), the DO concentration in the lower water column in Region I ( $31^\circ \text{ N} - 33.5^\circ \text{ N}$ ) was substantially larger than that in Region II ( $28.5^\circ \text{ N} - 31^\circ \text{ N}$ ) where the hypoxia water had a thickness of about 10 m (Fig. 4b). In addition, bottom DO in June of 2013 was overall about  $2.0\text{-}3.0 \text{ mg L}^{-1}$  lower than that in June of 2012 (Figs. 3a, e and Figs. 4a, b), and hypoxia occurred earlier in 2013. Previously, the occurrence of hypoxia in June was only reported in 2003 in the submarine river canyon near  $30.45^\circ \text{ N}$  (Xu, 2005).

285 In July, bottom DO was larger than  $7.0 \text{ mg L}^{-1}$  in the Changjiang estuary and Hangzhou Bay, except that  $\text{DO} < 4.0 \text{ mg L}^{-1}$  was found at stations X5 and X6 near the northern corner of the Changjiang estuary (Fig. 3f). In Region I, at all stations with depths larger than 30 m, bottom DO was less than  $3.0 \text{ mg L}^{-1}$ ; severe hypoxia occurred within  $32\text{-}32.4^\circ \text{ N}$ ,  $122.4\text{-}123.5^\circ \text{ E}$  over the western part of Region I. The huge area with  $\text{DO} < 3.0 \text{ mg L}^{-1}$  extended eastward. Over the middle shelf of the ECS, DO values were  $3.0\text{-}5.0 \text{ mg L}^{-1}$ . Overall, the DO concentrations in the southern and eastern parts of the survey area were higher than that in the middle part.

290 In August, the survey area was smaller than that in July (Fig. 3g). In Region I, the area of hypoxia was still large, and extended northward and eastward compared with July;  $\text{DO} < 2.0 \text{ mg L}^{-1}$  was observed at five stations and hypoxia area was

separated into several patches extending northward to 33° N and eastward to 125° E. Along section K (at 32° N, green lines in Fig. 2b, g), DO distribution showed that the thickness of the hypoxia water column reached 20-30 m from stations K2 to K6, extending about 100 kilometer in length (Fig. 4d), with a much lower DO value than that in August 2012 (Fig. 4c). In Region II, a low-oxygen center with DO <3.0 mg L<sup>-1</sup> was located in the northern end of the submarine river canyon.

295 In September, bottom DO over the western Region I increased quickly, while DO <3.0 mg L<sup>-1</sup> was still found near the northeastern edge of this region and hypoxia occurred near 33° N (Fig. 3h). Another area with DO <3.0 mg L<sup>-1</sup> was in the river canyon in Region II.

In 2013, hypoxia first appeared in Region II in June and was sustained in Region I in July, August and September. Multiple low-oxygen centers appeared from June to September. In Region II, the hypoxia centers were stably located in the coastal water near the 30-50 m isobaths. In Region I, the positions of hypoxia centers changed around the bank. Overall, compared with historical reports, in the summer of 2013 hypoxia appeared earlier, occupied a larger area, with a larger thickness, and was maintained longer over the Changjiang Bank.

#### 4. Discussion on influencing factors of DO concentration

##### 4.1 Hydrodynamic conditions based on observations in 2012 and 2013

305 Figures 5-8 present the spatial distribution and temporal evolution of  $N^2$ , bottom salinity, surface salinity and bottom temperature observed from the 2012 and 2013 cruises. The hydrographic conditions in the two years show a general consistency with the climatology based on historical observations (Editorial Board for Marine Atlas-Hydrology, 1992), but also show notable year-to-year differences. Spatial and temporal variations of hydrography in this region are influenced by bathymetry, surface forcing associated with monsoon, runoff of the Changjiang River, and circulation patterns including Kuroshio, TWC, YSC and coastal currents (Su, 2001).

The northward TWC consists of Taiwan Strait water in the upper layer characterized with high temperature and moderately high salinity ( $S >34.0$ ), and the KSW in the lower layer with low temperature and high salinity ( $S >34.5$ ) (Weng and Wang, 1985). Region II is the main region passing through by the TWC. The presence of stratification in this region is largely due to the occupation of the TWC water, and is also influenced by the coastal fresh water ( $S <31.0$ ) (Fig. 5 and Fig. 6). The KSW can be clearly identified by the characteristic oxygen concentration of about 5.0-6.0 mg L<sup>-1</sup> (Pan et al., 1993; Liu et al., 2012). Hence the KSW provides the relatively low and high oxygen water before and after the formation of low-oxygen center (DO <3.0 mg L<sup>-1</sup>), respectively. In 2012, the KSW intruded northward over 31° N in June and then reached at the north corner of the Changjiang estuary in August, covering the whole Region II and southern part of Region I (Fig. 6a-b). Till October, the KSW retreated (Fig. 6c). While in 2013, the intrusion of KSW was much weaker than that in 2012 (Fig. 6). The most northward intrusion occurred in July of 2013 (Fig. 6f).

320 In Region I, a strong halocline is created by the fresher CDW ( $S <30.0$ ) in the upper layer and the saltier lower layer

water. The CDW extension is mainly influenced by the advancement and recession of the TWC, especially its inner branch that flows parallel to the 50 m isobath into the river canyon and reaches the northern corner of the Changjiang estuary (Weng and Wang, 1985; Wei et al., 2015a). When the TWC intrudes further north over the continental shelf, the CDW tends to veer northeastward substantially (Wei et al., 2015a). This is the situation that occurred in 2012 (Fig. 6a-c and Fig. 7a-c). In 2013, with a weaker northward intrusion of the TWC, and combined with strong southerly wind (Wei et al., 2015a), the CDW expanded eastward significantly in July and resulted in strong stratification in the whole Region I (Fig. 5f and 7f).

The tidal front in the YS appears in May corresponding to surface heating and gets intensified gradually in the following three months. In Region I, this front is usually located near the northeastern edge and extends southeastward (Fig. 8). The YSW with relatively high DO concentration is transported by the YSC into Region I along the east side of the front. Here we use bottom  $T < 15.0$  °C to identify this water mass. In addition, the current along the western coast of the YS within 20 m isobath (i.e., SBCC in Fig. 1) flows northward as a response to the wind in summer (Liu and Hu, 2009). Both tidal front and northward coastal current are main obstacles for supplement of the YSW to the low-oxygen water in most parts of Region I.

In summary, the hydrodynamic condition, especially the TWC and the CDW, plays a leading role in the evolution, duration and intensity of stratification in waters adjacent to the Changjiang estuary. According to laboratory experiments, Liu et al. (2012) proposed that the main reason for hypoxia formation was not oxygen consumption but the lack of replenishment after consumption. Hence hypoxia may occur in any area if stratification is sustained over a considerable duration without DO replenishment.

#### 4.2. CDW spreading and stratification in Region I

In Region I, the low-oxygen centers are located where stratification is strong, and the pattern of hypoxia is influenced by the extension of the CDW.

In June 2012, both strong stratification and relative low-oxygen occurred in the western part of this region (Figs. 3a, 5a); and till August, strong stratification was maintained and DO decreased to less than 3.0 mg L<sup>-1</sup> (Figs. 3b, 5b). The CDW veered northeastward substantially (Fig. 7b), and below it a salinity front was produced as the TWC encountered the coastal fresh water (Fig. 6b). To the east of salinity front, there existed a tidal front (Fig. 8b). The DO-rich YSW was transported to the eastern area along this tidal front, leaving the absence of DO replenishment to the north of salinity front in western part. This resulted in the development of the previous low-oxygen area into hypoxia (Fig. 3b). In October, the CDW switched back to flowing southward along the coast. As stratification disappeared ( $N^2 < 10^{-3.5}$  s<sup>-2</sup>), bottom DO increased to 7.0 mg L<sup>-1</sup> (Figs. 3c, 5c).

In summer of 2013, the low-oxygen center and hypoxia over the Changjiang Bank all showed correspondence with strong stratification ( $N^2 > 10^{-2.0}$  s<sup>-2</sup>) (Fig. 3 and Fig. 5). In July, the CDW expanded eastward, covering a zone spanning from the Changjiang estuary to Jeju Island. This facilitated the formation of a large low-oxygen area with DO < 3.0 mg L<sup>-1</sup> over the

whole bank under strong stratification (Figs. 3f, 5f, 7f). In the meanwhile, DO supplement from the KSW and the YSW inhibited the formation of hypoxia in the southern and eastern bank, respectively (Figs. 6f, 8f). Hence, hypoxia events only happened in the western bank without DO supplement (Fig. 3f). In August, the KSW did not approach the Changjiang estuary, but retreated southward (Fig. 6g). Meanwhile, the northward migration of the tidal front (Fig. 8g) limited the DO replenishment by the YSW. As a consequence, a severe hypoxia over the eastern bank evolved from the low-oxygen with sustained stratification (Fig. 3g, 5g). In September, the CDW shrunk, and stratification was broken almost everywhere (Figs. 5h, 7h) with DO being increased (Fig. 3h). Near the northeastern edge of Region I, however, stratification ( $N^2 > 10^{-3.0} \text{ s}^{-2}$ ) was still persisted because of the vertical temperature differences, and low DO ( $< 3.0 \text{ mg L}^{-1}$ ) was maintained (stations I4, I5 and K6) with hypoxia occurring at the northeastern location (station I5).

In the bottom water of Region I, the YSW ( $T < 15.0 \text{ }^\circ\text{C}$ ), CDW ( $S < 30.0$ ), TWC water ( $S > 34.0$ ) and KSW ( $S > 34.5$ ) can be clearly identified, while the water of other salinity ranges is regarded as the Shelf Mixed Water (SMW) (Fig. 9a). Generally, the YSW in the north and KSW in the south provide relatively DO-rich water into this region. Thus, hypoxia was unlikely to happen in areas occupied by the YSW and KSW, but usually appeared in the SMW (Fig. 9a). This indicates that there is a limitation to track the hypoxia development based on bottom T and S. The relationship of DO with surface salinity and stratification (Fig. 9c) shows overall lower DO values and the occurrence of hypoxia under the CDW in summer. Hypoxia happened only when stratification was strong, while DO values were always larger than  $4.0 \text{ mg L}^{-1}$  when stratification was very weak ( $N^2 < 10^{-3.0} \text{ s}^{-2}$ ). Hypoxia and high DO concentration could both happen under strong stratification, suggesting that stratification is a necessary but insufficient condition for the formation of hypoxia over the bank. Despite of this, the bottom DO concentration in Region I with depths greater than 30 m was overall negatively correlated with the strength of stratification in summer and autumn, with a regression relationship of  $\text{DO} = -1.7 \times \log_{10}(N^2) + 0.4$  ( $r = -0.7$ , significant at the 0.05 confidence level) (Fig. 10a). In 2013, low-oxygen area was initially formed under the presence of strong stratification associated with the CDW. Then DO decreased continuously with the persistence of stratification even though the stratification weakened slightly (Fig. 10c). In areas without the supplement of DO-rich water, low-oxygen evolved into hypoxia (Fig. 10c). In 2012, the pattern of DO evolution was essentially the same as that in 2013 (Fig. 10b). When stratification was totally broken, DO recovered to a higher value (Fig. 10b).

In summer, the CDW spreads over the bank but the orientation of its extension may vary. For instance, the CDW spread northward in June 2012, and eastward in July 2013. The largest values of  $N^2$  were reached when the CDW lay over salty waters. Overall, hypoxia usually formed over the northwestern Changjiang Bank when the CDW extended northwestward, and in the eastern part when the CDW spread eastward substantially.

#### 4.3. KSW intrusion and stratification in Region II

In Region II, the appearance of low-oxygen centers is consistent with the distribution of strong stratification (Fig. 5), and the evolution of DO concentration can be mainly influenced by the lateral transport of the KSW.

A low-oxygen center often first occurs in the confluent area of coastal current (i.e., MZCC in Fig. 1) and the TWC, which is usually located between 30 m and 50 m isobaths where stratification is stronger and more persistent than that in the middle shelf of the ECS. In June and August of 2012, because of the intensive KSW intrusion toward the northern corner of the Changjiang estuary (Figs. 6a, b), hypoxia did not happen despite of the presence of strong stratification ( $N^2 > 10^{-2.5} \text{ s}^{-2}$ ) (Figs. 5a, b). In October of 2012, owing to the TWC recession and enhanced monsoon, stratification was overall weak and DO increased (Figs. 3c, 5c, 6c).

From May to September of 2013, the coastal area was strongly stratified (Figs. 5d-h). In May, the cumulative oxygen consumption was insufficient to cause low values of DO, despite of the development of stratification. In June, the southern branch of the CDW expanded more widely relative to June 2012 (Figs. 7a, e), and the TWC reached the latitude of  $30.5^\circ \text{ N}$  (Fig. 6e). This led to large values of  $N^2$  ( $N^2 > 10^{-2.0} \text{ s}^{-2}$ ) in the coastal area of Region II (Fig. 5e). With the presence of sustained stratification (May to June), DO was rapidly depleted and a large low-oxygen area formed. In the meanwhile, the KSW was located to the south of  $28^\circ \text{ N}$  (Figs. 6e, 8e) and could not provide the relatively DO-rich water. As a consequence, low-oxygen developed into hypoxia (Fig. 3e). In July, with the KSW intruding northward and occupying the majority of bottom water in region II (Fig. 6f), hypoxia faded away and did not re-appear afterward. Thus, the timely replenishment of the KSW could prevent the evolution of low-oxygen into hypoxia.

The bottom water of Region II is mainly composed of TWC water and KSW, and with some additions of Coastal Water (CW:  $S < 31.0$ ) and SMW (Fig. 9b). The distribution of DO against bottom T-S (Fig. 9b) indicates that hypoxia did not occur when  $S > 34.5$ , i.e., in the KSW; and when hypoxia occurred,  $S$  must be less than 34.5. The hypoxic potential was likely created by the TWC water due to the sustained stratification, and hypoxia tended to evolve in the absence of the KSW. There are evidences of this happened in the past. For example, previous studies reported the occurrence of hypoxia in the coastal area of Region II defined by us in August of 1959, 1976-85, 1981, 1999, 2002 and 2006; June of 2003; and September and October of 2006 (Table 1). Among these years, in 2006 hypoxia was maintained for three months while the KSW intruded at a southern location (Zou et al., 2008; Zhou et al., 2010; Wang et al., 2012); and in August 1959 hypoxia occurred in the northern end of the canyon where bottom salinity was 33.0 (Liu et al., 2012). For the other hypoxia cases, there was insufficient hydrological data to identify the locations of the KSW intrusion.

#### 4.4. An inter-comparison with hypoxia in the Gulf of Mexico

Worldwide, the frequent occurrence of hypoxia has been related to eutrophication (Conley et al., 2009). For the Gulf of Mexico, a statistical model for hypoxia prediction has been established based on nutrient loads from Mississippi River (Turner et al., 2006). The interannual variation of the extent of hypoxia waters has a strong correlation with the volume of river discharge in the northern Gulf of Mexico in spring and summer (Rabouille et al., 2008). However, for waters adjacent to the Changjiang estuary, hypoxia can be influenced by many complicated factors. Here hypoxia is not directly related to runoff from river. In summer of 2006 the runoff was extremely low (Fig. 11) but severe hypoxia occurred (Zou et al., 2008;

Zhou et al., 2010; Wang et al., 2012). In summer of 2012 the runoff was among the highest in the recent decade but only a small area of hypoxia existed in August (Figs. 3a-c and Fig. 11). Compared with 2012, in 2013 the runoff was lower by far but hypoxia occupied extremely large areas and sustained much longer (Figs. 3d-h and Fig. 11). Clearly, the area or volume of hypoxia adjacent to the Changjiang estuary cannot be predicted based on river runoff.

Over the Texas-Louisiana shelf in the northern Gulf of Mexico, the formation and destruction of hypoxia is primarily a local vertical process, and the biological processes are responsible for the variation of hypoxia from east to west (Hetland and DiMarco, 2008; Bianchi et al., 2010). Hypoxia is predominantly caused by water column respiration in the eastern region with steep shelf break, and by benthic respiration over the wide shelf to the west. Similarly, the hypoxia area adjacent to the Changjiang estuary can be divided into an area on the wide bank (Region I) and an area with steep slope (in Region II) according to bathymetry. Over the Changjiang Bank, low-oxygen is related to the presence of the CDW, while the CDW's position is influenced by the TWC (Wei et al., 2015a). Strong tidal mixing and monsoon may both induce the detachment of freshwater from the CDW (Xuan et al., 2012). This results in stronger changes of the river plume on the Changjiang Bank, compared with that on the west part of the Texas-Louisiana shelf where tides and wind are relatively weak. In Region II of the ECS, the occurrence of low-oxygen centers near the steep slope is related to bathymetric features, and the bottom DO in this region is significantly influenced by the shelf circulation including the TWC (stratification) and shoreward intrusion of the Kuroshio (DO replenishment).

Circulation conditions in the northern Gulf of Mexico and the ECS are distinctly different. The absence of strong offshore currents in the Mississippi margin results in a long residence time of the bottom water, in favor of biological respiration and hence frequent occurrence of hypoxia over a large spatial scale (Rabouille et al., 2008). Circulation in the ECS is strongly influenced by the presence of the strong western boundary current (Kuroshio). This results in a shorter residence time of the bottom water and hence less regular occurrence of hypoxia (Rabouille et al., 2008). Thus, in water adjacent to the Changjiang estuary, physical processes dominate over biological processes in driving the evolution of hypoxia. The prediction of low-oxygen requires salinity distribution at the bottom in Region II and at the surface in Region I, that defines the extensions of the KSW and the CDW, respectively.

## 5. Conclusions

As one of the major causes of ecological disasters in the coastal seas, especially in large river estuaries, hypoxia is becoming a global environmental issue and has attracted wide attention in recent decades. Based on new observational data from 2012 and 2013, the distribution of dissolved oxygen and evolution of hypoxia in waters adjacent to the Changjiang estuary are studied. The linkage of summer hypoxia with hydrodynamic conditions, including variations of water mass and stratification associated with circulation, is explored. The study area can be divided into Region I (the Changjiang Bank) and Region II (the region to the south of the estuary). The mechanisms dominating the evolution of stratification and DO distribution are different in these two regions.

450 a) In Region I, i.e., over the Changjiang Bank, there is a high possibility that hypoxia occurs from July to September. The distribution of bottom DO corresponds to the intensity of stratification, the two being in negative correlation according to  $DO = -1.7 \times \log_{10}(N^2) + 0.4$ . Hypoxia exists only when stratification is strong, while DO is larger than  $4.0 \text{ mg L}^{-1}$  when stratification is weak ( $N^2 < 10^{-3.0} \text{ s}^{-2}$ ). Over the bank, the appearance of low-oxygen areas is mostly related to the spreading of the Changjiang Diluted Water. The combination of the coastal current (SBCC in Fig.1, northward in summer) and tidal front  
455 restrains DO replenishment from surrounding waters. Therefore, under the condition of sustained stratification, low-oxygen tends to evolve into hypoxia. Generally, the coastal current transports the Yellow Sea Water to the Changjiang Bank after the transition of monsoon in autumn, when stratification has already disappeared. Thus, the inflow of the YSW may play a minor role in the relief of summer hypoxia over the bank.

b) In Region II, a confluent area of coastal current and the Taiwan Warm Current near the 30-50 m isobaths is where a  
460 low-oxygen center usually exists, and hypoxia may occur from June to October accompanied by strong stratification. Associated with bathymetric feature, salinity fronts exist throughout the year in the northern end and block the DO exchange with water to the north. Thus DO-rich water mainly comes from the south. The Kuroshio Subsurface Water ( $S > 34.5$ ) carried by the inner branch of the TWC can substantially affect the bottom DO concentration in this region. Hypoxia is difficult to form if the KSW appears early in the middle shelf of the ECS and intrudes further northward in summer. In this region,  
465 hypoxia does not occur at locations with bottom  $S > 34.5$ ; and when hypoxia does occur, there must be bottom  $S < 34.5$ .

In summary, based on new observations in 2012 and 2013, especially in 2013 with monthly data from May to September, it is evident that hypoxia in waters adjacent to the Changjiang estuary is substantially influenced by shelf circulation, including the CDW plume, the TWC and the KSW intrusion. The hypoxia evolution in 2013 was distinctly different from that in 2006 and 1958-1959. Due to the lack of monthly observations covering the same region in different  
470 years, credible model simulations of inter-annual variations of hydrodynamic conditions are needed for further investigating the linkage of hypoxia with the KSW intrusion and the CDW spreading. We hope that combining analyses of observational data and modelling results shall eventually lead to better prediction of the spatial and temporal variations of hypoxia.

#### Acknowledgements

This study was supported by the National Basic Research Program of China (Grant No.2011CB403606 & 2010CB428904)  
475 and the National Natural Science Foundation of China (NSFC, Grant No.41376112). Liang Zhao was funded by the Strategic Priority Research Program of the Chinese Academy of Sciences (XDA11020305) and NSFC under Grant No. 41276016.

#### References

Bianchi, T. S., DiMarco, S. F., Cowan Jr, J. H., Hetland, R. D., Chapman, P. J., Day, W., and Allison, M. A.: The science of  
480 hypoxia in the Northern Gulf of Mexico: a review, *Sci. of the Total Environ.*, 408, 1471-1484,



doi:10.1016/j.scitotenv.2009.11.047, 2010.

Chen, C. C., Gong, G. C., and Shiah, F. K.: Hypoxia in the East China Sea: One of the largest coastal low-oxygen areas in the world, *Mar. Environ. Res.*, 64, 399-408, doi:10.1016/j.marenvres.2007.01.007, 2007.

485 Chen, J. Y., Chen, X. L., and Yang, Q. L.: Report of Comprehensive Survey on Resources in Coastal Zone of Shanghai, Shanghai Science and Technology Press, Shanghai, China, 390 pp, 1988. (in Chinese)

Conley, D. J., Carstensen, J., Vaquer-Sunyer, R., and Duarte, C. M.: Ecosystem thresholds with hypoxia, *Hydrobiologia*, 629, 21-29, doi:10.1007/s10750-009-9764-2, 2009.

Diaz, R. J., and Rosenberg, R.: Spreading dead zones and consequences for marine ecosystems, *Science*, 321, 926-929, doi:10.1126/science.1156401, 2008.

490 Editorial Board for Marine Atlas: Marine Atlas of Bohai Sea, Yellow Sea, East China Sea: Hydrology, China Ocean Press, Beijing, 1992. (in Chinese).

Feng, Y., DiMarco, S. F., and Jackson, G. A.: Relative role of wind forcing and riverine nutrient input on the extent of hypoxia in the northern Gulf of Mexico, *Geophys. Res. Lett.*, 39, L09601, doi:10.1029/2012GL051192, 2012.

495 Gu, H. K.: The maximum value of dissolved oxygen in its vertical distribution in Yellow Sea, *Acta Oceanol. Sin.*, 2, 70-80, 1980. (in Chinese, with English Abstract.)

Hetland, R., and DiMarco, S.: How does the character of oxygen demand control the structure of hypoxia on the Texas-Louisiana continental shelf? *J. Mar. Syst.*, 70, 49-62, doi:10.1016/j.jmarsys.2007.03.002, 2008.

Li, D. J., Zhang, J., Huang, D. J., Wu, Y., and Liang, J.: Oxygen depletion off the Changjiang (Yangtze River) estuary. *Science in China (Series D)*, 32, 686-694, 2002.

500 Li, H. L., Chen, J. F., Lu, Y., Jin, H. Y., Wang, K., and Zhang, H. S.: Seasonal variation of DO and formation mechanism of bottom water hypoxia of Changjiang River Estuary, *J. Mar. Sci.*, 29, 78-87, doi:10.3969/j.issn.1001-909X.2011.03.010, 2011.

505 Limeburner, R., Beardsley, R. C., and Zhao J. S.: Water masses and circulation in the East China Sea, International symposium on sedimentation on the continental shelf, with special reference to the East China Sea, China Ocean Press, Beijing, China, 285-294, 1983.

Liu, H. X., Li, D. J., Gao, L., Wang, W. W., and Chen W. Q.: Study on main influence factors of formation and deterioration of summer hypoxia off the Yangtze River Estuary, *Adv. in Mar. Sci.*, 30, 186-197, 2012. (in Chinese, with English Abstract.)

- 510 Liu, Z. L., and Hu, D. X.: Preliminary study on the Huanghai Sea coastal current and its relationship with local wind in summer, *Acta Oceanol. Sin.*, 31, 1-7, 2009. (in Chinese, with English Abstract.)
- Mao, H. L., Ren, Y. W., and Sun, G. D.: A preliminary study on the hydrographic characteristics and water types in summer in the Southern Yellow Sea and the East China Sea (28°-37°N, *Studia Marina Sinica*, 1, 23-77, 1964. (in Chinese)
- 515 Pan, Y. Q., Su, J. L., and Su, Y. F.: Seasonal hydrographic characteristics in the Southern East China Sea, Selected papers of investigation and study on the Kuroshio current (Five), Beijing: Ocean Press, 186-200, 1993. (in Chinese, with English Abstract.)
- Rabouille, C., Conley, D. J., Dai, M. H., Cai, W. J., Chen, C. T. A., Lansard, B., and McKee, B.: Comparison of hypoxia among four river-dominated ocean margins: The Changjiang (Yangtze), Mississippi, Pearl, and Rhone rivers, *Cont. Shelf Res.*, 28, 1527-1537, doi:10.1016/j.csr.2008.01.020, 2008.
- 520 Shi, X. Y., Lu, R., Zhang, C. S., and Wang, X. L.: Distribution and main influence factors process of dissolved oxygen in the adjacent area of the Changjiang estuary in autumn, *Periodical of Ocean Univ. of China*, 36, 287-290, 2006a. (in Chinese, with English Abstract.)
- Shi, J. Z., Zhang, S. Y., and Hamilton, L. J.: Bottom fine sediment boundary layer and transport processes at the mouth of the Changjiang estuary, *China. J. Hydrology*, 327, 276-288, doi:10.1016/j.jhydrol.2005.11.039, 2006b.
- 525 Su, J. L.: A review of circulation dynamics of the coastal oceans near China, *Acta Oceanol. Sin.*, 23, 1-16, 2001. (in Chinese, with English Abstract.)
- Su, Y. S., Li, F. Q., and Wang, F. Q.: Water type distribution and water regime division in the Bohai, Yellow and East China Seas, *Acta Oceanol. Sin.*, 18, 1-7, 1996. (in Chinese, with English Abstract.)
- The State Bureau of Technical Supervision: The specification for oceanographic survey & oceanographic survey data processing, 1992. (in Chinese)
- 530 Tian, R. C., Hu, F. X., and Martin, J. M.: Summer nutrient fronts in the Changjiang (Yangtze River) estuary, *Estuarine, Coastal and Shelf Sci.*, 37, 27-41, doi:10.1006/ecss.1993.1039, 1993.
- Turner, R. E., Rabalais, N. N., and Justic, D.: Predicting summer hypoxia in the northern Gulf of Mexico: Riverine N, P, and Si loading, *Mar. Pollution Bulletin*, 52, 139-148, doi:10.1016/j.marpolbul.2005.08.012, 2006.
- 535 Wang, B. D., and Wang, X. L.: Chemical hydrography of coastal upwelling in the East China Sea, *Chinese J. Oceanol. and Limnol.*, 25, 16-26, doi:10.1007/s00343-007-0016-x, 2007.
- Wang, B. D.: Hydromorphological mechanisms leading to hypoxia off the Changjiang estuary, *Mar. Environ. Res.*, 67, 53-58, doi:10.1016/j.marenvres.2008.11.001, 2009.

- Wang, B. D., Wei, Q. S., Chen, J. F., and Xie, L. P.: Annual cycle of hypoxia off the Changjiang (Yangtze River) Estuary, *Mar. Environ. Res.*, 77, 1-5, doi:10.1016/j.marenvres.2011.12.007, 2012.
- 540 Wei, H., He, Y. C., Li, Q. J., Liu, Z. Y., and Wang, H. T.: Summer hypoxia adjacent to the Changjiang estuary, *J. Mar. Syst.*, 67, 292-303, doi:10.1016/j.jmarsys.2006.04.014, 2007.
- Wei, H., Luo, X. F., Zhao, Y. D., and Zhao, L.: Intraseasonal variation in the salinity of the Yellow and East China Seas in the summers of 2011, 2012, and 2013, *Hydrobiologia*, 754, 13-28, doi:10.1007/s10750-014-2133-9, 2015a.
- 545 Wei, Q. S., Wang, B. D., Chen, J. F., Xia, C. S., Qu, D. P., and Xie, L. P.: Recognition on the forming-vanishing process and underlying mechanisms of the hypoxia off the Yangtze River estuary, *Sci. China: Earth Sci.*, 45(2), 187-206, doi: 10.1007/s11430-014-5007-0, 2015b.
- Wei, Q. S., Zhan, R., Wei, X. H., Zang, J. Y., Wang, S. Q., and Wang, Z. X.: Distribution of dissolved oxygen and hypoxia characteristics in the northeast sea of the Yangtze estuary, *Adv. in Mar. Sci.*, 28, 32-40, 2010. (in Chinese, with English Abstract.)
- 550 Wei, Q. S., Yu, Z. G., Xia, C. S., Zang, J. Y., Ran, X. B., and Zhang, X. L.: A preliminary analysis on the dynamic characteristics of the hypoxic zone adjacent to the Changjiang estuary in summer, *Acta Oceanol. Sin.*, 33, 100-109, 2011. (in Chinese, with English Abstract.)
- Weng, X. C., and Wang, C. M.: A study on Taiwan Warm Current Water, *Mar. Sci.*, 9, 7-10, 1985. (in Chinese, with English Abstract.)
- 555 Xu, S. M.: The distribution and environmental significance of redox sensitive elements off the Changjiang estuary hypoxia zone and its contiguous sea area, Ph.D. Thesis, Ocean University of China. Qingdao, China, unpublished, 2005. (in Chinese, with English Abstract.)
- Xuan, J. L., Huang, D. J., Zhou, F., Zhu, X. H., Fan X. P.: The role of wind on the detachment of low salinity water in the Changjiang estuary in summer, *J. Geophys. Res.*, 117, C10007, doi:10.1029/2012JC008121, 2012.
- 560 Zhang, Y. Y., Zhang, J., Wu, Y., and Zhu, Z. Y.: Characteristics of dissolved oxygen and its affecting factors in the Yangtze Estuary, *Environ. Sci.*, 28, 1649-1654, 2007. (in Chinese, with English Abstract.)
- Zhang, Z. Q.: On maximum and minimum dissolved oxygen with bottom layer in Yellow Sea and northern east China Sea in summer. *Bulletin of Mar. Sci.*, 9, 22-26, 1990. (in Chinese, with English Abstract.)
- 565 Zhang, Z., Zhang, Z. F., Han, G. C., Wang, Y., Wang, L. J., and He, X.: Spatio-temporal variation, formation and transformation of the hypoxia area off the Yangtze River Estuary, *Mar. Environ. Sci.*, 31, 469-473, 2012. (in Chinese, with English Abstract.)

Zhao, B. R.: The frontal of the Huanghai Sea Cold Water Mass induced by tidal mixing, *Oceanol. et Limnol. Sin.*, 16, 451-460, 1985. (in Chinese, with English Abstract.)

570 Zhao, B. R., Ren, G. F., Cao, D. M., and Yang, Y. L.: Characteristics of the ecological environment in upwelling area adjacent to the Changjiang River Estuary, *Oceanol. et Limnol. Sin.*, 32, 327-333, 2001. (in Chinese, with English Abstract.)

Zhou, F., Huang, D. J., Ni, X. B., Xuan, J. L., Zhang, J., and Zhu, K. X.: Hydrographic analysis on the multi-time scale variability of hypoxia adjacent to the Changjiang River Estuary, *Acta Oceanol. Sin.*, 17, 4728-4740, 2010. (in Chinese, with English Abstract.)

575 Zhu, J. R., Zhu, Z. Y., Lin, J., Wu, H., and Zhang, J.: Distribution of hypoxia and pycnocline off the Changjiang Estuary, China, *J. Mar. Sci.*, [http:// dx.doi.org/10.1016/j.jmarsys.2015.05.002](http://dx.doi.org/10.1016/j.jmarsys.2015.05.002), 2015.

Zhu, Z.Y.: Hypoxia in the Changjiang estuary and its adjacent area-started with phytoplankton pigments, Ph.D. Thesis, East China Normal University. Shanghai, China, unpublished, 2007. (in Chinese, with English Abstract.)

Zou, J. J., Yang, G., Liu, J. H., Shi, X. F., and Fang, X. S.: Distribution characteristics of dissolved oxygen in the sea area adjacent to the Changjiang river in September, *Adv. in Mar. Sci.*, 26, 65-73, 2008. (in Chinese, with English Abstract.)

580

**Tables and Figures:****Table 1.** Records of locations and values of minimum dissolved oxygen off the Changjiang estuary.

| Time            | Location  |          | Min. DO<br>value (mg L <sup>-1</sup> ) | References               |
|-----------------|-----------|----------|----------------------------------------|--------------------------|
|                 | Longitude | Latitude |                                        |                          |
| Aug., 1959      | 122°45'   | 31°15'   | 0.34                                   | Liu et al., 2012         |
| Aug., 1976–1985 | 123°00'   | 31°00'   | 0.80                                   | Zhang, 1990              |
| Aug., 1981      | 123°00'   | 30°50'   | 2.0                                    | Limeburner et al., 1983  |
| Aug., 1988      | 123°00'   | 30°50'   | 1.96                                   | Tian et al., 1993        |
| Aug., 1998      | 124°00'   | 32°10'   | 1.44                                   | Wang and Wang, 2007      |
| Aug., 1999      | 122°59'   | 30°51'   | 1.0                                    | Li et al., 2002          |
| Aug., 2002      | 122°29'   | 32°00'   | 1.73                                   | Shi et al., 2006a, 2006b |
|                 | 123°00'   | 31°00'   | 1.99                                   |                          |
| Jun., 2003      | 122°50'   | 30°50'   | ~1.0                                   | Xu, 2005                 |
| Aug., 2003      | 123°30'   | 31°30'   | 2.0                                    | Chen et al., 2007        |
| Sep., 2003      | 122°56'   | 30°49'   | 0.8                                    | Wei et al., 2007         |
|                 | 122°45'   | 31°55'   | <1.5                                   |                          |
| Aug., 2005      | 122°48'   | 32°18'   | 1.55                                   | Zhu et al., 2007         |
| Jul., 2006      | 122°23'   | 32°42'   | 1.36                                   | Wei et al., 2010         |
| Aug., 2006      | 122°55'   | 32°55'   | 1.0                                    | Zhou et al., 2010        |
|                 | 122°30'   | 29°12'   | <2                                     |                          |
| Sep., 2006      | 123°06'   | 30°09'   | 1.96                                   | Zou et al., 2008         |
| Oct., 2006      | 123°21'   | 30°05'   | 1.8                                    | Zhou et al., 2010        |
| Aug., 2012      | 122°41'   | 33°00'   | 1.0                                    | this study               |
| Jun., 2013      | 122°39'   | 29°50'   | 1.5                                    | this study               |
|                 | 122°52'   | 29°48'   | 1.6                                    |                          |
| Jul., 2013      | 122°19'   | 32°24'   | 1.7                                    | this study               |
|                 | 122°19'   | 32°03'   | 1.6                                    |                          |
|                 | 122°36'   | 31°54'   | 1.8                                    |                          |
|                 | 123°25'   | 32°10'   | 1.9                                    |                          |
| Aug., 2013      | 123°44'   | 33°00'   | 1.8                                    | this study               |
|                 | 123°01'   | 32°00'   | 1.9                                    |                          |
|                 | 123°32'   | 32°00'   | 1.8                                    |                          |
|                 | 124°28'   | 32°00'   | 1.3                                    |                          |
|                 | 124°46'   | 32°00'   | 1.2                                    |                          |
| Sep., 2013      | 123°58'   | 33°02'   | 1.1                                    | this study               |

**Table 2.** Information of cruises analyzed in this study.

| Cruise    | Sampling Date     | Number of Stations and Research Area     | Instrumentation               | Research Vessel      |
|-----------|-------------------|------------------------------------------|-------------------------------|----------------------|
| 201206    | 08-29 Jun.        | 54 stations<br>in the YECS <sup>a</sup>  | SBE 17 <i>plus</i><br>RBR620  | <i>Beidou</i>        |
| 201208    | 11-20 Aug.        | 42 stations<br>in the YECS               | SBE 17 <i>plus</i><br>RBR620  | <i>Beidou</i>        |
| 201210    | 09-26 Oct.        | 42 stations<br>in the YECS               | SBE 19 <i>plus</i><br>RBR620  | <i>Beidou</i>        |
| 201305-I  | 11-15 May         | 9 stations<br>in Subei Bank              | RBR620                        | <i>Suruyuyun288</i>  |
| 201305-II | 11-15 May         | 15 stations off<br>Zhejiang Coast        | SBE 911 <i>plus</i><br>RBR620 | <i>Zhepuyu 23012</i> |
| 201306    | 15-19 Jun.        | 48 stations<br>in the YECS               | SBE 911 <i>plus</i><br>RBR620 | <i>Beidou</i>        |
| 201307-I  | 16-22 Jul.        | 20 stations in the<br>Changjiang estuary | RBR620                        | <i>Runjiang1</i>     |
| 201307-II | 12 Jul. - 01 Aug. | 74 stations<br>in the YECS               | SBE 911 <i>plus</i><br>RBR620 | <i>Dongfanghong2</i> |
| 201308    | 13 Aug. - 02 Sep. | 63 stations<br>in the YECS               | SBE 17 <i>plus</i><br>RBR620  | <i>Beidou</i>        |

585 <sup>a</sup> YECS: Yellow and East China Seas

590

595 Table 3. Averaged values of DO (in  $\text{mg L}^{-1}$ ) and the logarithm of the maximum squared buoyancy frequency (in  $\text{s}^{-2}$ ) in Region I from different monthly cruises.  $N$  denotes the number of samples.

| cruise | DO      | $N^2$    | N  |
|--------|---------|----------|----|
| 201206 | 6.5±1.6 | -2.3±0.9 | 12 |
| 201208 | 3.9±1.1 | -2.0±0.5 | 10 |
| 201210 | 7.1±0.4 | -3.9±0.3 | 11 |
| 201306 | 4.3±0.7 | -2.5±0.5 | 11 |
| 201307 | 2.6±0.6 | -1.8±0.3 | 16 |
| 201308 | 2.3±0.7 | -2.1±0.4 | 13 |
| 201309 | 4.8±1.9 | -2.8±0.8 | 14 |

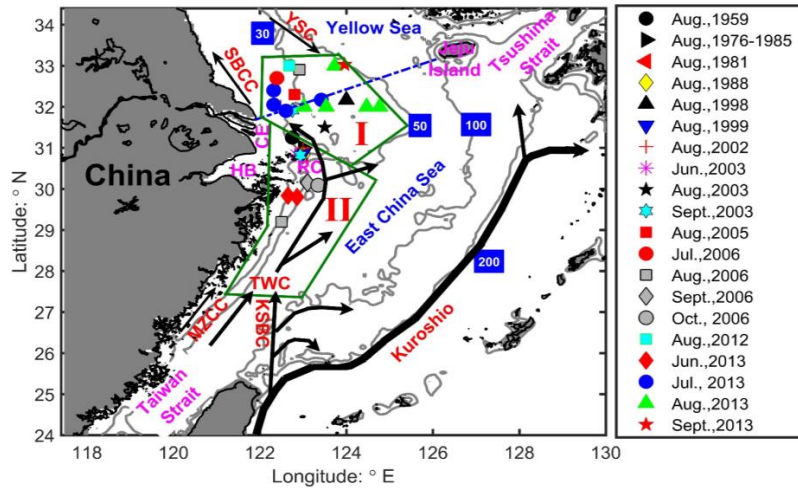

600

Figure 1. Topography and schematic map of summer circulation in the Yellow Sea and East China Sea. Black arrows denote circulation including the Yellow Sea Current (YSC), Subei Coastal Current (SBCC), Minzhe Coastal Current (MZCC), Taiwan Warm Current (TWC), Kuroshio Subsurface Branch Current (KSBC) and Kuroshio. CE, HB and RC are short for the Changjiang estuary, Hangzhou Bay and submarine river canyon, respectively. Various symbols represent sampling stations of different cruises labelled in the right pane that observed the occurrence of hypoxia. Polygons outlined by green lines are I. Changjiang Bank and II. the region to the south of the Changjiang estuary. The contours in gray denote isobaths of 30, 50, 100, and 200 m. Dotted blue line marks the boundary between the Yellow sea and the East China Sea.

605

610



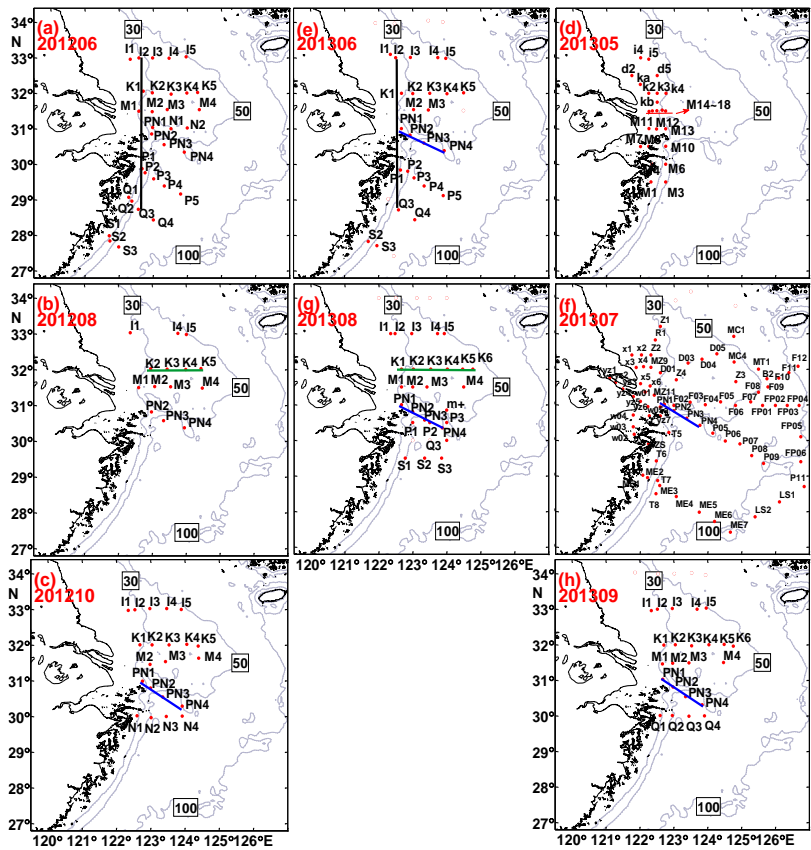

615 **Figure 2.** Maps of sampling stations off the Changjiang estuary (a-c: June, August and October in 2012; d-h: May to September in 2013). The layout is designed to ease comparison between 2012 and 2013 for June and August. Black, green and blue bold lines denote section at 122.5°E and section K in Fig. 4, and section PN in Fig. 5, respectively.

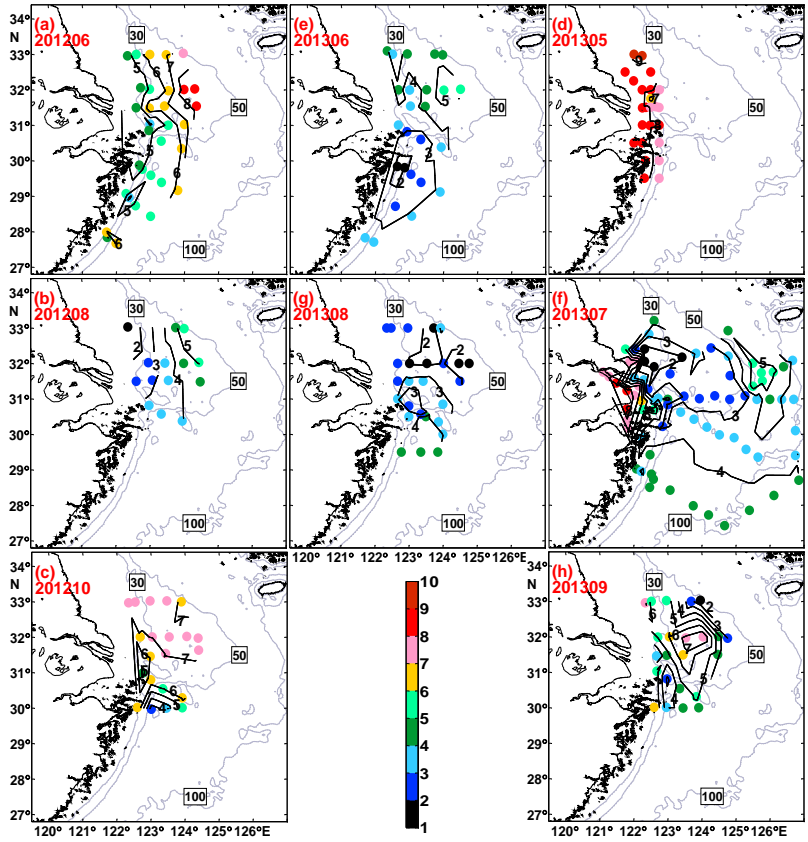

Figure 3. Dissolved oxygen concentration (mg L<sup>-1</sup>) of bottom water in the same layout as Fig. 2.

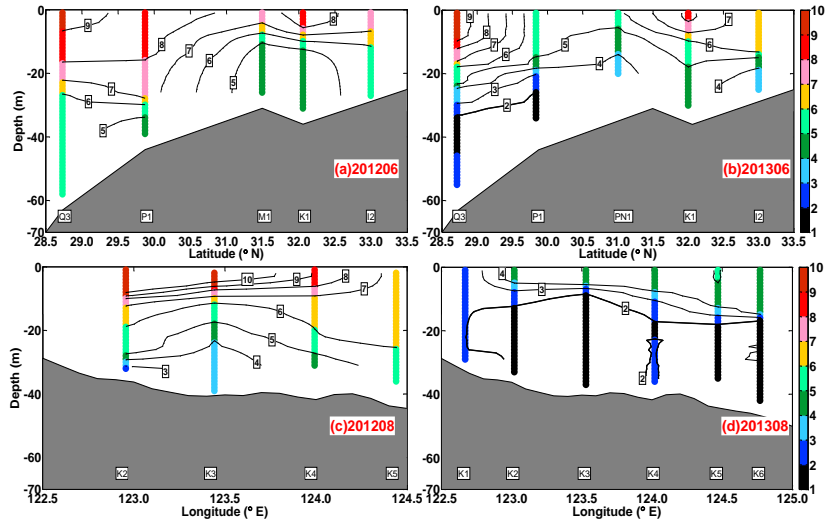

625 **Figure 4.** Dissolved oxygen concentration ( $\text{mg L}^{-1}$ ) along section at  $122.5^\circ\text{E}$  (a: June 2012; b: June 2013) and section K (c: August 2012; d: August 2013).

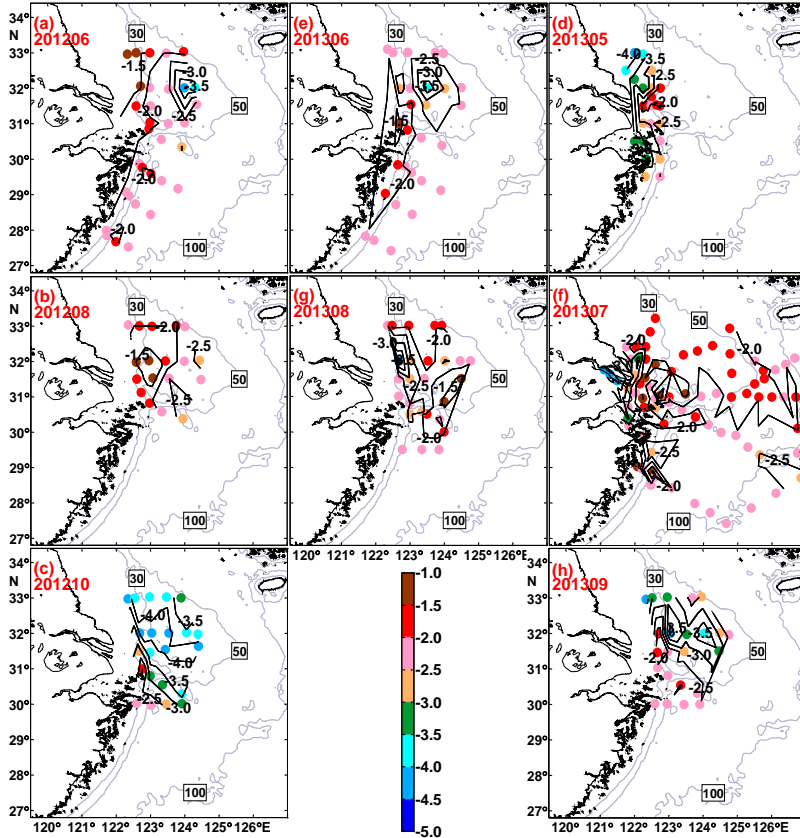

630

Figure 5. Same as Fig. 3 except for maximum squared buoyancy frequency at logarithmic scale ( $N^2$ :  $s^{-2}$ ).

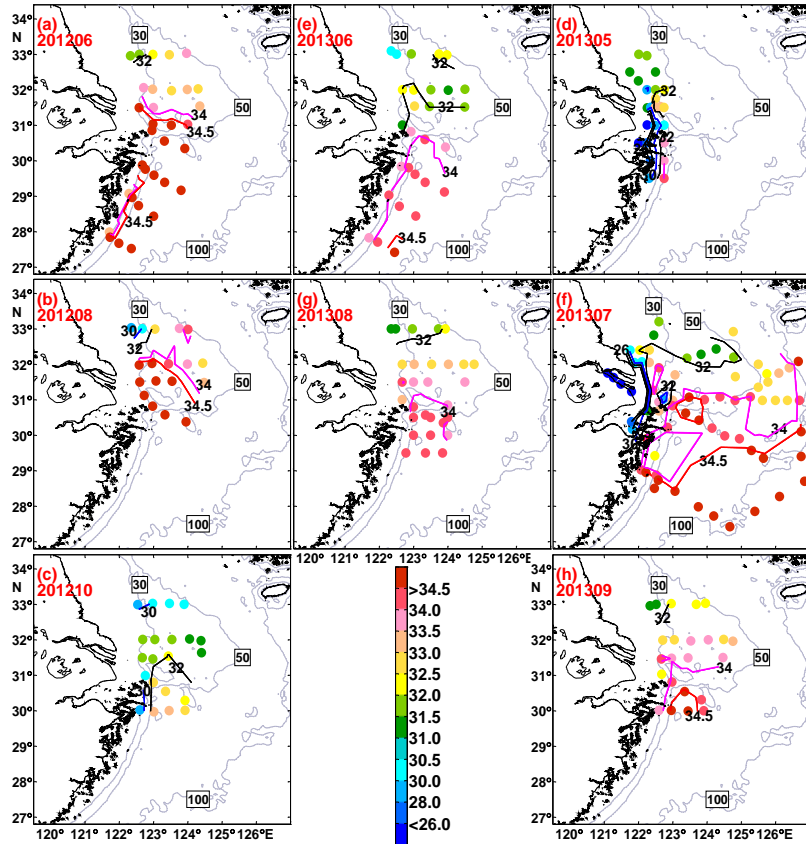

**Figure 6.** Same as Fig. 3 except for bottom salinity (in psu). The contour of  $S = 30.0$  in blue represents the extension of the Changjiang Diluted Water;  $S = 34.0$  in magenta represents the Taiwan Warm Current; and  $S = 34.5$  in red indicates the intrusion of Kuroshio Subsurface Water.

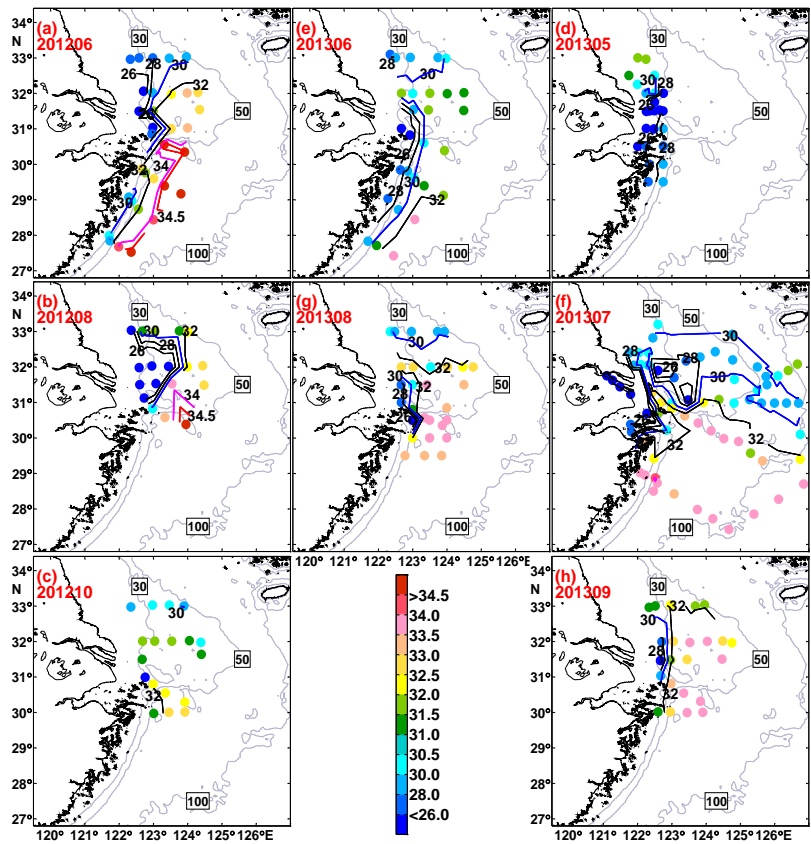

Figure 7. Same as Fig. 6 except for surface salinity (in psu).

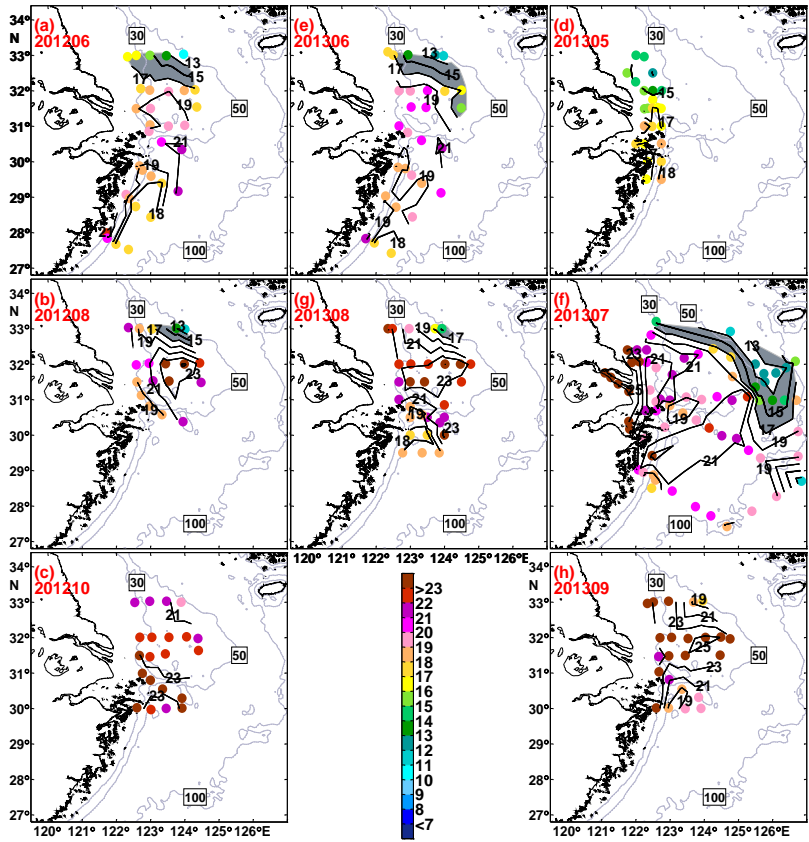

Figure 8. Same as Fig. 3 except for bottom temperature (in °C). Shading area denotes frontal zone.

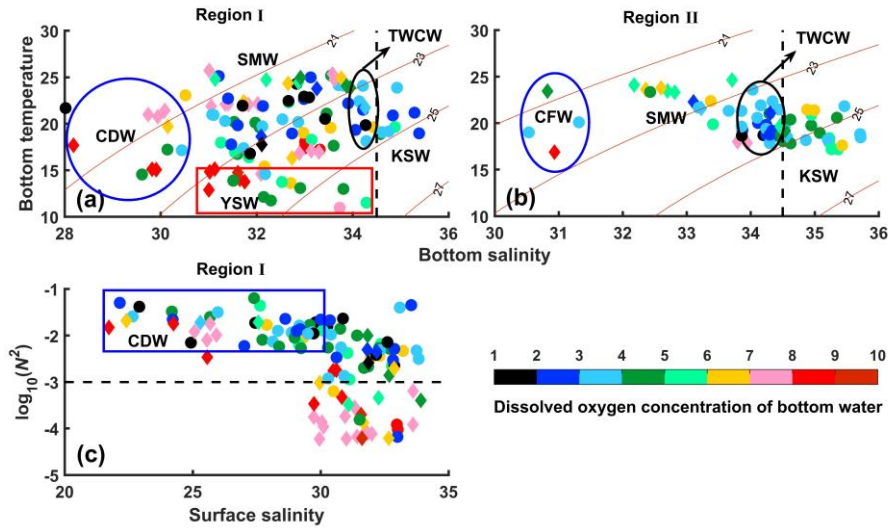

Figure 9. Variations of DO (in mg L<sup>-1</sup>) corresponding to bottom salinity (in psu) and bottom temperature (°C) for (a) Region I and (b) Region II, and (c) corresponding to surface salinity (in psu) and the logarithm of maximum squared buoyancy frequency ( $N^2$ : in s<sup>-2</sup>) for Region I. Dots stand for samplings collected in summer (June to August); diamonds in spring (May) and autumn (September and October). TWCW, KSW, SMW, YSW, CDW and CW are abbreviations of Taiwan Warm Current Water, Kuroshio Subsurface Water, Shelf Mixed Water, Yellow Sea Water, Changjiang Diluted Water and Coastal Water.



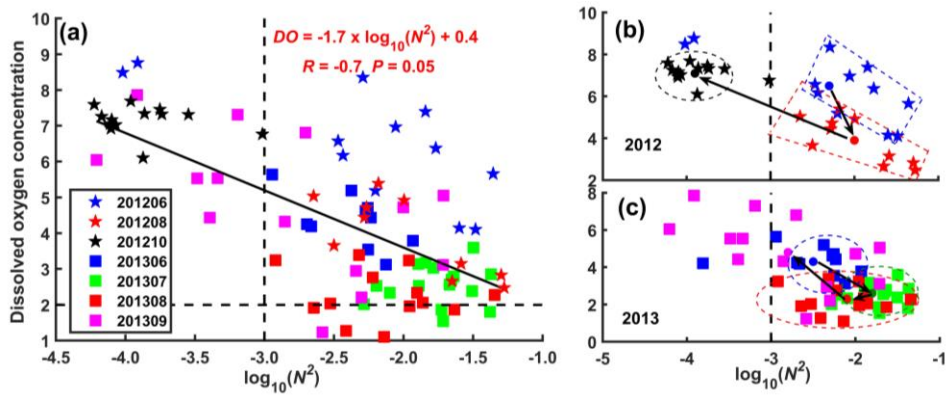

Figure 10. The distribution of DO (in mg L<sup>-1</sup>) versus  $\log_{10}(N^2)$  in Region I with water depth greater than 30 m for  
 660 (a) all samplings in 2012 and 2013 and separately in (b) 2012 and (c) 2013. Color symbols denote samplings  
 collected during different monthly cruises. The black solid line in (a) denotes the linear regression relationship. In  
 (b) and (c), black arrows illustrate the seasonal evolution of DO in 2012 and 2013, respectively; colored dots  
 denote the averaged values of DO and  $N^2$  of different months (also listed in Table 3).

665

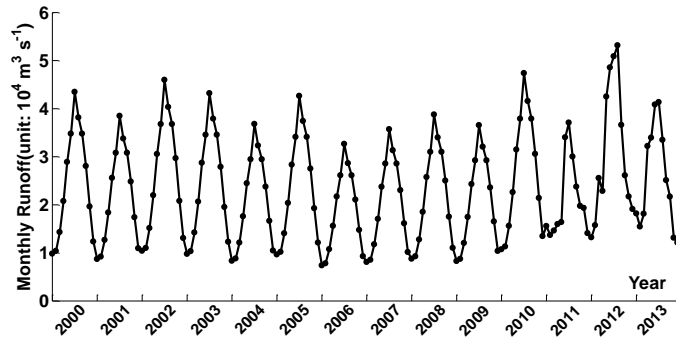

670 **Figure 11.** Monthly discharge of the Changjiang River in 2000–2013, averaged from daily monitoring data collected at the Datong Hydrologic Station (<http://yu-zhu.vicp.net/>).

## On influencing factors of hypoxia disaster in waters adjacent to the Changjiang estuary

680 Xiaofan Luo<sup>1</sup>, Hao Wei<sup>2</sup>, Renfu Fan<sup>2</sup>, Zhe Liu<sup>1</sup>, Liang Zhao<sup>1</sup>, Youyu Lu<sup>3</sup>

<sup>1</sup> College of Marine Science and Engineering, Tianjin University of Science & Technology, Tianjin, 300457, China

<sup>2</sup> School of Marine Science and Technology, Tianjin University, Nankai District, Tianjin, 300072, China

<sup>3</sup> Ocean Sciences Division, Department of Fisheries and Oceans, Bedford Institute of Oceanography, Dartmouth, Nova Scotia, B2Y 4A2, Canada

685 *Correspondence to:* Hao Wei ([weihao@ouc.edu.cn](mailto:weihao@ouc.edu.cn))

*\*These authors contributed equally to this work and should be considered co-first authors.*

**Abstract.** Based on observational data from ten cruises carried out in 2012 and 2013, the distribution of dissolved oxygen (DO) and hypoxia ( $DO < 2.0 \text{ mg L}^{-1}$ ) evolution in waters adjacent to the Changjiang estuary are studied. The linkage between summer hypoxia and hydrodynamic conditions is explored. The results suggest that hypoxia frequently occurred from June to October to the south of the Changjiang estuary near the 30-50 m isobaths and was prone to happen under strong stratification without the presence of the Kuroshio Subsurface Water (KSW). Over the Changjiang Bank, hypoxia mainly occurred in July, August and September. Low-oxygen areas initially exist-appear under strong stratification induced by the spreading of the Changjiang Diluted Water (CDW), and develop into hypoxia centers due to the lack of supplement of the relatively DO-rich Yellow Sea Water and the KSW. The evolution of hypoxia in a year is influenced by conditions of the shelf circulation especially the paths of the KSW and the CDW. Thus, further study on the salinity evolution in the bottom layer of the water to the south of the Changjiang estuary and in the surface layer over the Changjiang Bank, that indicates the extensions of the KSW and the CDW, is needed for improving the hypoxia prediction.

### 1 Introduction

700 Most species of marine living depend on dissolved oxygen (DO) in the water and are threatened by ~~is important for marine~~

带格式的: 非上标/下标

带格式的: 断字

带格式的: 字体: 10 磅

705 ~~life. Low-low~~ concentration of DO (e.g.,  $<3.0 \text{ mg L}^{-1}$ ) ~~causes hardship and even threats for most species living in the ocean.~~  
In coastal waters, increasing occurrence of extremely low DO concentration, i.e. hypoxia ( $\text{DO} < 2.0 \text{ mg L}^{-1}$ ), is becoming a  
global environmental issue (Diaz and Rosenberg, 2008; Conley et al., 2009). One of the main goals of regional environment  
management is to ~~reduce-monitor and control~~ the area and volume of hypoxia, and this requires understanding and prediction  
of low-oxygen evolution (Feng et al., 2012). It is generally agreed that stratification and organic matter degradation are main  
reasons for the formation of hypoxia. ~~However, s~~Stratification is influenced by ~~different-various~~ physical processes, ~~and for~~  
For hypoxia in estuarine regions, there have been continuous debates on the roles played by the riverine nutrient loads and  
freshwater discharge (Bianchi et al., 2010).

710 Since the middle of last century, seasonal survey has ~~started-for-revealed the occurrence of~~ hypoxia in the lower water  
~~column-column~~ adjacent to the Changjiang estuary (~~Fig. 1~~), an area with ~~a~~-high primary production on the shelf of East  
China Sea (ECS) (Fig. 1) (Gu, 1980; Chen et al., 1988; Tian et al., 1993; Zhao et al., 2001). ~~However, h~~Hypoxia was not  
identified as an important factor affecting the ecosystem ~~of the East China Sea (ECS) in this region~~ until the study carried out  
by the Chinese GLOBEC (Global Ocean Ecosystem Dynamics) project in the summer of 1999 (Li et al., 2002). Subsequently,  
summer hypoxia in this region has been continuously reported based on sparse ship-based observations ~~has been reported~~  
715 (Shi et al., 2006a; Wei et al., 2007; Wang, 2009). ~~Currently, t~~The Changjiang estuary ~~is currently~~has been regarded as one of  
the largest coastal hypoxia areas in the world (Chen et al., 2007).

720 A completed picture of the spatial and temporal variations of DO concentration adjacent to the Changjiang estuary has  
started to emerge based on analysis of observation data collected so far. The spatial distribution and monthly evolution of  
low oxygen adjacent to the Changjiang estuary were revealed by analyzing the observations made monthly from From May  
to October in 2006, ~~intense observations were made in this region by various -on different station grids by different-~~research  
teams (Zhang et al., 2007; Zhou et al., 2010; Li et al., 2011; Wei et al., 2011; Wang et al., 2012). The synthesis of analyzing  
observations revealed that ~~It-in~~ 2006, low-oxygen center did not appear in May but existed in June in waters along the coast  
~~of Zhejiang Province (to the south of the Changjiang estuary). Over the Changjiang Bank~~In July, a hypoxia center firstly  
725 appeared in the western part of the Changjiang Bank in July first, and then in August, two hypoxia centers appeared to the  
north and south of the ~~outer-Changjiang~~ estuary ~~in August~~, with the one in the north being more severe. In September and  
October, the hypoxia center ~~re-appeared-existed~~ to the south of the Changjiang estuary. Data from the monthly survey from  
September of 1958 to September of 1959 was recently re-analyzed (Liu et al., 2012). It was found that the low-oxygen center  
appeared to the south of the estuary in May and June, appeared near the mouth of the Changjiang River estuary in July and  
730 August, and re-appeared to the south of the estuary in September. This evolution of the low-oxygen center showed  
correspondence with the extension of the Taiwan Warm Current (TWC) which consists of Taiwan Strait water in the upper  
layer and the Kuroshio Subsurface Water (KSW) in the lower layer. The lowest DO value was  $0.34 \text{ mg L}^{-1}$  in August of 1959,  
a highly severe hypoxia but did not draw much attention for about 40 years.

735 Generally, the formation of hypoxia is related to high rate of primary production, long resident time of bottom water,  
persistent presence of stratification and specific bathymetry of continental shelf (Rabouille et al., 2008). For hypoxia in the  
waters adjacent to the Changjiang estuary, previous studies have identified the important roles played by the pycnocline  
between the freshwater from river discharge and the upwelled water from the TWC, and the abundant bottom detritus from  
surface phytoplankton blooms (Li et al., 2002; Zhang et al., 2007). ~~However, the presence of pycnocline and mounting  
740 detritus does not always correspond to the existence of hypoxia, nor can it explain the evolution of the spatial distribution of  
hypoxia. However, hypoxia did not always exist under the condition of pycnocline and mounting detritus, hence these  
processes cannot explain the evolution of the spatial distribution of hypoxia.~~ Zhou et al. (2010) analyzed the observed  
bottom DO, water temperature and salinity ~~off in waters adjacent to~~ the Changjiang estuary in June, August, October of 2006,  
and made comparison with observational data in August of 1998 and 1999. They concluded that the temporal evolution of  
hypoxia is mainly caused by the spatial structure of water mass. Based on observations in 2006, Wei et al. (2011) suggested  
that the northward spreading of hypoxia was caused by eutrophication ~~in-off~~ the Changjiang estuary, intensification of the  
745 TWC, and the northward shift of the upwelling region. Based on analysis of observed bottom DO distributions in January  
and in each month from April to November in 2006, Wang et al. (2012) concluded that the location of hypoxia center was  
controlled by stratification and the northward expansion of the TWC. Zhang et al. (2012) suggested that stratification caused  
by the Changjiang Diluted Water (CDW, fresh water from river discharge) was the main reason for hypoxia formation while  
the water advected from the Yellow Sea (YS) could weaken hypoxia; the competition of the two processes induced the  
750 spatial and temporal variations of bottom DO concentration. ~~On the basis of~~ Based on observations from June to August, and  
October in 2006 and from August to September in 2009, Zhu et al. (2015) emphasized the occurrence of hypoxia related to  
the presence of pycnocline, emphasized the influence of pycnocline on the spatial variation of hypoxia. Through combining  
reanalysis of data from 2006 to 2007 with results of an ocean circulation model, Wei et al. (2015b) noted possible influence  
of seasonal circulation condition on the position of hypoxia in regions adjacent to ~~off~~ the Changjiang estuary.

755 Previous studies have reached a consensus that the movement of water masses and changes of stratification induced by  
ocean circulation variations are all responsible for the formation and development of hypoxia. However, there lacks  
agreement on which factor, among the TWC, the CDW, fronts and the Yellow Sea Water (YSW), plays the dominant role. It  
is possible that each previous study captured one aspect of hypoxia formation and ~~variation-evolution~~ in a specific area, but  
the conclusion was limited by the particular dataset analyzed. For instance, the hypoxia center in summer of 2006 was  
760 located at a northern position relative to 1959, but did this northward shift occur frequently in recent years? Is it generally  
true that from beginning to the end of summer, the hypoxia center appeared successively at the southern, northern, then back  
to southern locations? What is the exact evolution of hypoxia from formation to decay? Besides the blocking of oxygen  
exchange by stratification, ~~and~~ fronts and ocean eddies, how are DO distribution and hypoxia evolution influenced by the  
~~lateral transport of the~~ TWC accompanied with the Kuroshio Subsurface Water (KSW)? What role does the YSW play?

765 From a synthesis of observations of hypoxia reported in literatures and made within the recent decade (Fig. 1 and Table  
1), significant year-to-year variations in the location and evolution of hypoxia can be identified. This study attempts to  
further explore the influence of changes in hydrodynamic condition on the evolution of hypoxia through analyzing new  
observations carried out in June, August and October in 2012 and monthly from May to September in 2013. According to  
hydrodynamic condition and topography features, we divide the waters adjacent to the Changjiang estuary into two regions  
770 (Fig.1). Region I covers the fairly flat Changjiang Bank with depths less than 50 m. Region II covers the region to the south  
of the Changjiang estuary including a steep slope approximately between 30-50 m isobaths, the submarine river canyon and  
part of the middle shelf of the ECS with depths between 50-100 m, the southern and northern sub-regions (Fig. 1). The  
southern sub-region includes the offshore water of Zhejiang, the submarine river canyon and the middle shelf of the ECS.  
The northern region is the Changjiang Bank.The low-oxygen/hypoxia centers in the two years will be are mapped out from  
775 the observed bottom DO distribution. Distributions of stratification and hydrography will be are described. By linking the  
DO distribution to variations of hydrodynamic condition, we analyze the relative contributions of the TWC, the CDW and  
the YS tidal front in the two sub-regions, with a special attention paid on the influence of the lateral advection of the KSW.

## 2 Field observations and data processing

Concentrations of DO and hydrographic data are obtained from 10 cruises carried out in June, August and October in 2012,  
780 and monthly from May to September in 2013 (Table 2). The data for May and July in 2013 is a merge of observations made  
from two ships in each month. RBR 620-CTD with Seapoint sensor of DO was used in all the 10 cruises to measure profiles  
of water temperature, salinity, DO concentration. SBE-CTD was deployed in 8 cruises excluding the survey on Subei Shoal  
in May of 2013 to the north of the Changjiang estuary and that in July of 2013 in within the Changjiang estuary in July of  
785 2013. When both RBR 620-CTD and SBE-CTD took measurements, the profiles of water temperature and salinity from  
SBE-CTD were used because of the higher sampling frequency and precision of this instrument.

Data recorded during descending profiling are used. For each profile, the inverse pressure calibration was applied and  
spikes were removed as the basic data quality control. For each cruise that covered the whole observational grids, about 100  
water samples were taken from surface, middle and bottom layers were taken from stations along selected sections. Salinity  
of these samples was measured by the SYA2-2 salinometer in laboratory to calibrate the salinity from the CTD measurement  
790 in each cruise. The DO sensor on RBR620-CTD was calibrated prior to each cruise as the following. It was firstly put into  
pure water aerated by oxygenate pump for 60 minutes to get the voltage for DO reaching 100 % saturation, and was then put  
into the anoxia water (i.e., saturated sodium sulfite solution) to get the voltage for zero DO reading. The DO concentration  
was determined according to the linear scaling between these two voltages. During some cruises, the chemistry group also  
used the Winkler Titration method to measure the DO of water samples from different layers at selected stations. This  
795 enabled an alternative calibration of the DO measured by the DO sensor. Data was sampled at high frequencies, for instance,  
24 Hz for the SBE-CTD and 8 Hz for the RBR-620 CTD. The raw data was averaged over 0.2 m vertical intervals. The

buoyant frequency ( $N^2$ ) was calculated from water temperature and salinity. The maximum  $N^2$  in a profile was used to represent the stratification intensity of the water column at a particular station.

Stations to the south of 33° N are chosen for analyzing hypoxia ~~in water adjacent to off~~ the Changjiang estuary (Fig. 1). Sampling grids for each cruise and sections to be discussed in following sections are shown in Fig. 2. According to Su et al. (1996), salinity can be used to identify water mass in the ECS, i.e.,  $S < 30.0$  representing the diluted water, ~~34.5~~  $S > 34.0$  for the TWC water ~~that includes the KSW with~~ and  $S > 34.5$  ~~for the KSW~~. ~~In general, the 17.0 °C isothermal can be as the boundary between the YS cold water and its surrounding water (Mao et al., 1964). Thus, The we take the~~ area with bottom temperature in the range of 13.0-17.0 °C ~~stands for to represent~~ the summer tidal front of the YS (Zhao, 1985). According to China's 1992 National Marine Investigation Standard by the State Bureau of Technical Supervision ~~(the State Bureau of Technical Supervision, 1992)~~, the pycnocline is defined to exist if the vertical gradient of density is larger than 0.1 kg m<sup>-4</sup> for the water depth less than 200 m. This equals to the maximum  $N^2$  of a vertical profile larger than  $1.0 \times 10^{-3.0} \text{ s}^{-2}$ . ~~( $N^2$  is used to denote the maximum  $N^2$  of a vertical profile in the following).~~

### 3. Results ~~Bottom DO concentration observed in 2012 and 2013~~

#### 3.1. ~~Bottom DO concentration in June, August and October, 2012~~

There was no hypoxia in June of 2012 (Fig. 3a). The bottom DO concentration was larger than 4.0 mg L<sup>-1</sup>, with higher values in the eastern part and lower values in the western part of survey area. A band of relatively low DO concentration of 4.0-5.0 mg L<sup>-1</sup> was found along the 30 m isobath to the north of 29° N.

In August (Fig. 3b), ~~the DO concentration was 2.0-3.0 mg L<sup>-1</sup> lower than that in June.~~ There were only a few stations located in ~~the southern area Region II (Fig. 3b). The DO concentration was 2.0-3.0 mg L<sup>-1</sup> lower than that in June.~~ Over the western side of ~~the Changjiang Bank, i.e. near the Subei Bank Region I,~~ DO < 3.0 mg L<sup>-1</sup> was observed. A hypoxia center with DO = 1.0 mg L<sup>-1</sup> appeared in the northwestern survey field (station I1, at 33° N, 122.5° E).

In October, the DO concentration of bottom water was elevated (Fig. 3c). ~~In Region II, (two centers of relatively low-oxygen were present centers still existed to the south of the Changjiang estuary though hypoxia disappeared.~~ These two centers were located near the northern end of the submarine river canyon with DO = 4.8 mg L<sup>-1</sup> (station PN1), and the ~~offshore waters of Zhejiang steep slope~~ with DO < 4.0 mg L<sup>-1</sup>, about 2.0 mg L<sup>-1</sup> lower than that in the surrounding waters.

Overall, in summer of 2012 hypoxia off the Changjiang estuary was not severe. There was no hypoxia in June and October though ~~the~~ low-oxygen centers existed. The hypoxia center was located in ~~the northern sub-region Region I~~ in August.

#### 3.2. ~~Bottom DO concentration from May to September, 2013~~

In May, the vertical and horizontal distributions of DO were fairly homogenous (Fig. 3d, vertical distribution was not shown).

带格式的: 字体: 倾斜

带格式的: 字体: 倾斜, 上标

带格式的: 字体: 非加粗

DO values were 8.0-9.0 mg L<sup>-1</sup> in the near shore region and 7.0-8.0 mg L<sup>-1</sup> in the offshore region. The minimum DO value, located at station kb, was 6.7 mg L<sup>-1</sup>.

In June, ~~DO values at most stations in Region I were less than 5.0 mg L<sup>-1</sup> (Fig. 3e). In Region II, DO was lower than 4.0 mg L<sup>-1</sup> in the southern sub-region, and a~~ hypoxia center appeared near the slope ~~along between~~ the 30-50 m isobaths offshore of Zhejiang. ~~DO values at most stations to the north of the Changjiang estuary were less than 5.0 mg L<sup>-1</sup> (Fig. 3e).~~ Along the 122.5° E section ~~(black lines in Fig. 2a, e), the DO concentration in the lower water column over the Changjiang Bank in Region I (31° N - 33.5° N) was substantially larger than that to the south of in Region II (28.5° N - 31° N) where the hypoxia water had a thickness of about 10 m (Fig. 4b). In the southern area, the hypoxia water had a thickness of about 10 m in June (Fig. 4b). In addition, bottom~~ DO in June of 2013 was overall about 2.0-3.0 mg L<sup>-1</sup> lower than that in June of 2012 (Figs. 3a, e and Figs. 4a, b), and hypoxia occurred earlier in 2013. Previously, ~~the~~ occurrence of hypoxia in June was only reported in 2003 in the submarine river canyon near 30.45° N (Xu, 2005).

In July, bottom DO was larger than 7.0 mg L<sup>-1</sup> in the Changjiang estuary and Hangzhou Bay, except that DO <4.0 mg L<sup>-1</sup> was found at stations X5 and X6 near the northern corner of the Changjiang ~~river mouth estuary~~ (Fig. 3f). ~~Over the Changjiang Bank in Region I,~~ at all stations with ~~water depths~~ larger than 30 m, bottom DO was less than 3.0 mg L<sup>-1</sup>; severe hypoxia occurred within 32-32.4° N, 122.4-123.5° E over the western part of ~~the bank~~ Region I. The huge area with DO <3.0 mg L<sup>-1</sup> extended ~~to southwest of Jeju Island eastward. Over the middle shelf of the ECS, DO values were 3.0-5.0 mg L<sup>-1</sup> over the middle shelf of the ECS.~~ Overall, the DO concentrations in the southern and eastern parts of the survey area were higher than that in the middle part.

In August, the survey area was smaller than that in July (Fig. 3g). ~~Over the Changjiang Bank in Region I,~~ the area of hypoxia was still large, and extended northward and eastward compared with July ~~(Fig. 3g); DO <2.0 mg L<sup>-1</sup> was observed at five stations and hypoxia area was separated into several patches extending northward to 33° N and eastward to 125° E. Along section K (at 32° N, green lines in Fig. 2b, g), DO distribution showed that the thickness of the hypoxia water column reached 20-30 m from stations K2 to K6, extending about 100 kilometer in length (Fig. 4d), with a much lower DO value than that in August 2012 (Fig. 4c). In the southern sub-region~~ Region II, a low-oxygen center with DO <3.0 mg L<sup>-1</sup> was located in the northern end of the submarine river canyon. ~~DO distribution along section K (at 32° N) showed that the hypoxia water reached 30 m thickness from stations K2 to K6 over the Changjiang Bank, extending about 100 km in length (Fig. 4d). DO <2.0 mg L<sup>-1</sup> was observed at five stations and hypoxia area was separated into several patches extending northward to 33° N and eastward to 125° E. Over the whole bank, DO was less than 4.0 mg L<sup>-1</sup>; much lower than that in August 2012 (Fig. 4e).~~

In September, ~~the DO concentration~~ bottom DO over the western bank Region I increased quickly, while DO <3.0 mg L<sup>-1</sup> was still found near in the ~~outer-northeastern~~ edge of this region ~~the bank~~ and hypoxia occurred near 33° N (Fig. 3h). Another area with DO <3.0 mg L<sup>-1</sup> was in the river canyon ~~to the south of the Changjiang estuary in Region II.~~

In 2013, hypoxia first appeared in ~~the southern sub-region~~ Region II in June and was sustained ~~over the Changjiang~~



860 Bankin Region I in July, August and September. Multiple low-oxygen centers appeared from June to September. In the  
southern sub-regionRegion II, the hypoxia centers were stably located in the coastal water near the 30-50 m isobaths. In the  
northern sub-regionRegion I, the positions of hypoxia centers changed around the bank. Overall, compared with historical  
reports, in the summer of 2013 hypoxia appeared earlier, occupied a larger area, with a larger thickness, and was maintained  
longer over the Changjiang Bank.

#### 865 4. Discussion on influencing factors of DO concentration

##### 870 4.1 Hydrodynamic conditions based on observations in 2012 and 2013~~Climatological evolution of hydrodynamic conditions~~

870 Figures 5-8 present the spatial distribution and temporal evolution of  $N_2$ , bottom salinity, surface salinity and bottom  
temperature observed from the 2012 and 2013 cruises. The hydrographic conditions in the two years show a general  
consistency with the climatology based on historical observations (Editorial Board for Marine Atlas-Hydrology, 1992), but  
also show notable year-to-year differences. Spatial and temporal variations of hydrography in this region~~The evolution of~~  
hydrodynamic conditions in the Yellow and East China Seas is are influenced by related to bathymetry, surface forcing  
associated with monsoon, runoff of the Changjiang River, and circulation patterns including Kuroshio, TWC, YSC and  
coastal currents~~runoff of the Changjiang River, and bathymetry of the region (Su, 2001).~~

875 The northward TWC consists of Taiwan Strait water in the upper layer characterized with high temperature and  
moderately high salinity ( $S > 34.0$ ), and the KSW in the lower layer with low temperature and high salinity ( $S > 34.5$ ) (Weng  
and Wang, 1985). Region II is the main region passing through by the TWC. The presence of stratification in this region is  
largely due to the occupation of the TWC water, and is also influenced by the coastal fresh water ( $S < 31.0$ ) (Fig. 5 and Fig.  
6). The KSW can be clearly identified by the characteristic oxygen concentration of about 5.0-6.0 mg L<sup>-1</sup> (Pan et al., 1993;  
880 Liu et al., 2012). Hence the KSW provides the relatively low and high oxygen water before and after the formation of low-  
oxygen center ( $DO < 3.0$  mg L<sup>-1</sup>), respectively. In 2012, the KSW intruded northward over 31° N in June and then reached at  
the north corner of the Changjiang estuary in August, covering the whole Region II and southern part of Region I (Fig. 6a-b).  
Till October, the KSW retreated (Fig. 6c). While in 2013, the intrusion of KSW was much weaker than that in 2012 (Fig. 6).  
The most northward intrusion occurred in July of 2013 (Fig. 6f).

885 In Region I, a strong halocline is created by the fresher CDW ( $S < 30.0$ ) in the upper layer and the saltier lower layer  
water. The CDW extension is mainly influenced by the advancement and recession of the TWC, especially its inner branch  
that flows parallel to the 50 m isobath into the river canyon and reaches the northern corner of the Changjiang estuary (Weng  
and Wang, 1985; Wei et al., 2015a). When the TWC intrudes further north over the continental shelf, the CDW tends to veer  
northeastward substantially (Wei et al., 2015a). This is the situation that occurred in 2012 (Fig. 6a-c and Fig. 7a-c). In 2013,  
890 with a weaker northward intrusion of the TWC, and combined with strong southerly wind (Wei et al., 2015a), the CDW  
expanded eastward significantly in July and resulted in strong stratification in the whole Region I (Fig. 5f and 7f).

带格式的: 字体: 倾斜

带格式的: 字体: 倾斜, 上标

带格式的: 字体: 10 磅

带格式的: 字体: 10 磅, 字体颜色: 自定义颜色 (RGB(0,0,10))

带格式的: 字体: 10 磅

带格式的: 缩进: 首行缩进: 2 字符

带格式的: 缩进: 首行缩进: 0.28 英寸

In each year, stratification starts to develop in May corresponding to surface heating. The tidal front in the YS appears in May corresponding to surface heating and gets intensified gradually in the following three months. In Region I, this front is usually located near the northeastern edge and extends southeast-ward across the Changjiang Bank (Fig. 8). The YSW with relatively high DO concentration is transported by the YSC into Region I along the east side of the front. Here we use bottom  $T < 15.0\text{ }^{\circ}\text{C}$  to identify this water mass. In summer addition, the current along the western coast of the YS (within 20 m isobath) (i.e., SBCC in Fig. 1) flows northward as a response to the wind in summer (Liu and Hu, 2009). Both tidal front and northward coastal current are main obstacles for supplement of the YSW to the low-oxygen water over the Changjiang Bank in most parts of Region I.

The CDW extension is mainly influenced by the advancement and recession of the TWC, especially its inner branch (Weng and Wang, 1985; Wei et al., 2015a). When the TWC intrudes further north over the continental shelf, the CDW tends to veer northeastward substantially. A strong halocline over the Changjiang Bank is created by the CDW and the water in lower layer. The combination of halocline and thermal stratification blocks the oxygenate aeration of the lower layer from the surface.

The TWC consists of Taiwan Strait water in the upper layer characterized with high temperature and moderately high salinity, and the KSW in the lower layer with low temperature and high salinity (Weng and Wang, 1985). The pycnocline is formed in the region passing through by the TWC, and is also influenced by the coastal fresh water to the south of the Changjiang estuary. The KSW can be clearly identified by the characteristic oxygen concentration ( $4.5\text{ mg L}^{-1}$ ). Hence the KSW provides the relatively low and high oxygen water before and after the formation of low oxygen center ( $\text{DO} < 3.0\text{ mg L}^{-1}$ ), respectively. The TWC has two branches over the continental shelf. In May, the TWC is reinforced by the southerly wind. The near shore branch of the TWC flows northward along the 50–60 m isobath offshore of Zhejiang into the submarine river canyon, and in July it can reach the northern corner of the Changjiang river mouth. This branch upwells to the sea surface in the coastal area to the south of the Changjiang estuary. The outer branch of the TWC can reach the Changjiang Bank along the middle shelf of the ECS. It flows along the edge of the bank in May and June, across the bank in July and August, along the edge again in September and October. Eventually, the TWC runs into the Tsushima Strait (Su, 2001).

In summary, the hydrodynamic condition, especially the TWC and the CDW, plays a leading role in the evolution, duration and intensity of stratification in waters adjacent to the Changjiang estuary. According to laboratory experiments, Liu et al. (2012) proposed that the main reason for hypoxia formation was not oxygen consumption but the lack of replenishment after consumption. Hence hypoxia may occur in any area if stratification is sustained over a considerable duration without DO replenishment.

#### 4.2. Bottom DO, CDW spreading and stratification in Region I

In Region I, the low-oxygen centers are located where stratification is strong, and the pattern of hypoxia is influenced by the extension of the CDW.

带格式的: 缩进: 首行缩进: 0 英寸

925 In June 2012, both strong stratification and relative low-oxygen occurred in the western part of this region (Figs. 3a, 5a);  
and till August, strong stratification was maintained and DO decreased to less than 3.0 mg L<sup>-1</sup> (Figs. 3b, 5b). The CDW  
veered northeastward substantially (Fig. 7b), and below it a salinity front was produced as the TWC encountered the coastal  
fresh water (Fig. 6b). To the east of salinity front, there existed a tidal front (Fig. 8b). The DO-rich YSW was transported to  
the eastern area along this tidal front, leaving the absence of DO replenishment to the north of salinity front in western part.  
930 This resulted in the development of the previous low-oxygen area into hypoxia (Fig. 3b). In October, the CDW switched  
back to flowing southward along the coast. As stratification disappeared ( $N^2 < 10^{-3.5} \text{ s}^{-2}$ ), bottom DO increased to 7.0 mg L<sup>-1</sup>  
(Figs. 3c, 5c).

935 In summer of 2013, the low-oxygen center and hypoxia over the Changjiang Bank all showed correspondence with  
strong stratification ( $N^2 > 10^{-2.0} \text{ s}^{-2}$ ) (Fig. 3 and Fig. 5). In July, the CDW expanded eastward, covering a zone spanning from  
the Changjiang estuary to Jeju Island. This facilitated the formation of a large low-oxygen area with DO < 3.0 mg L<sup>-1</sup> over the  
940 whole bank under strong stratification (Figs. 3f, 5f, 7f). In the meanwhile, DO supplement from the KSW and the YSW  
inhibited the formation of hypoxia in the southern and eastern bank, respectively (Figs. 6f, 8f). Hence, hypoxia events only  
happened in the western bank without DO supplement (Fig. 3f). In August, the KSW did not approach the Changjiang  
estuary, but retreated southward (Fig. 6g). Meanwhile, the northward migration of the tidal front (Fig. 8g) limited the DO  
replenishment by the YSW. As a consequence, a sever hypoxia over the eastern bank evolved from the low-oxygen with  
945 sustained stratification (Fig. 3g, 5g). In September, the CDW shrunk, and stratification was broken almost everywhere (Figs.  
5h, 7h) with DO being increased (Fig. 3h). Near the northeastern edge of Region I, however, stratification ( $N^2 > 10^{-3.0} \text{ s}^{-2}$ ) was  
still persisted because of the vertical temperature differences, and low DO (< 3.0 mg L<sup>-1</sup>) was maintained (stations I4, I5 and  
950 K6) with hypoxia occurring at the northeastern location (station I5).

945 In the bottom water of Region I, the YSW ( $T < 15.0 \text{ }^\circ\text{C}$ ), CDW ( $S < 30.0$ ), TWC water ( $S > 34.0$ ) and KSW ( $S > 34.5$ ) can  
be clearly identified, while the water of other salinity ranges is regarded as the Shelf Mixed Water (SMW) (Fig. 9a).  
Generally, the YSW in the north and KSW in the south provide relatively DO-rich water into this region. Thus, hypoxia was  
unlikely to happen in areas occupied by the YSW and KSW, but usually appeared in the SMW (Fig. 9a). This indicates that  
950 there is a limitation to track the hypoxia development based on bottom T and S. The relationship of DO with surface salinity  
and stratification (Fig. 9c) shows overall lower DO values and the occurrence of hypoxia under the CDW in summer.  
Hypoxia happened only when stratification was strong, while DO values were always larger than 4.0 mg L<sup>-1</sup> when  
stratification was very weak ( $N^2 < 10^{-3.0} \text{ s}^{-2}$ ). Hypoxia and high DO concentration could both happen under strong  
stratification, suggesting that stratification is a necessary but insufficient condition for the formation of hypoxia over the  
bank. Despite of this, the bottom DO concentration in Region I with depths greater than 30 m was overall negatively  
955 correlated with the strength of stratification in summer and autumn, with a regression relationship of  $\text{DO} = -1.7 \times \log_{10}(N^2) +$   
0.4 ( $r = -0.7$ , significant at the 0.05 confidence level) (Fig. 10a). In 2013, low-oxygen area was initially formed under the  
presence of strong stratification associated with the CDW. Then DO decreased continuously with the persistence of

带格式的: 字体: 倾斜

带格式的: 上标

stratification even though the stratification weakened slightly (Fig. 10c). In areas without the supplement of DO-rich water, low-oxygen evolved into hypoxia (Fig. 10c). In 2012, the pattern of DO evolution was essentially the same as that in 2013 (Fig. 10b). When stratification was totally broken, DO recovered to a higher value (Fig. 10b).

In summer, the CDW spreads over the bank but the orientation of its extension may vary. For instance, the CDW spread northward in June 2012, and eastward in July 2013. The largest values of  $N^2$  were reached when the CDW lay over salty waters. Overall, hypoxia usually formed over the northwestern Changjiang Bank when the CDW extended northwestward, and in the eastern part when the CDW spread eastward substantially.

#### 4.3. KSW intrusion and stratification in the southern sub-region Region II

In the southern sub-region Region II, the appearance of low-oxygen centers was consistent with the distribution of strong stratification (Fig. 5), and the evolution of DO concentration can be mainly influenced by the lateral transport of the KSW with  $DO = 4.5 \text{ mg L}^{-1}$ .

A low-oxygen center often first occurs in the confluent area of coastal current (i.e., MZCC in Fig. 1) and the TWC, which is usually located between 30 m and 50 m isobaths where stratification is stronger and more persistent than that in the middle shelf of the ECS. In June and August of 2012, because of the intensive KSW intrusion toward the northern corner of the mouth of the Changjiang estuary (Figs. 6a, b), hypoxia did not happen despite of the presence of strong stratification ( $N^2 > 10^{-2.5} \text{ s}^{-2}$ ) (Figs. 5a, b). In October of 2012, owing to the TWC recession and enhanced monsoon, stratification was overall weak and DO increased (Figs. 3c, 5c, 6c and Table 3).

From May to September of 2013, the southern coastal area was strongly stratified (Figs. 5d-h and Table 3). In May, the cumulative oxygen consumption was insufficient to cause low values of DO, despite of the development of stratification. The persistence of stratification was insufficient for oxygen consumption, resulting the presence of relatively high DO concentration. In June, the southern branch of the CDW expanded more widely relative to June 2012 (Figs. 7a, e), and the TWC reached the latitude of  $30.5^\circ \text{ N}$  (Fig. 6e). This led to a large values of  $N^2$  values ( $N^2 > 10^{-2.0} \text{ s}^{-2}$ ) in the coastal water area to the south of the Changjiang estuary of Region II (Fig. 5e). With the presence of sustained stratification (May to June), DO was rapidly consumed depleted and a large low-oxygen area formed. In the meanwhile, the KSW was located to the south of  $28^\circ \text{ N}$  (Figs. 6e, 8e) and could not provide the relatively DO-rich water via lateral transportation. As a consequence, the low-oxygen area developed into hypoxia (Fig. 3e). In July, with the KSW intruding northward and occupying the majority of bottom water in the southern sub-region region II (Fig. 6f), hypoxia faded away and did not re-appear afterward. Thus, the timely replenishment of the KSW could prevent the evolution of low-oxygen center into hypoxia.

The bottom water of Region II is mainly composed of TWC water and KSW, and with some additions of Coastal Water (CW:  $S < 31.0$ ) and SMW (Fig. 9b). The distribution of DO against bottom T-S. The scatter plot of the bottom salinity versus DO concentration in the southern sub-region (Fig. 9ba) indicates shows that hypoxia did not occur when  $S > 34.5$ , i.e., in the KSW; and when hypoxia occurred,  $S$  must be less than 34.5. The hypoxic potential was likely created by the TWC water due

带格式的: 缩进: 首行缩进: 0.28 英寸

带格式的: 缩进: 首行缩进: 0.28 英寸

990 to the sustained stratification, and hypoxia tended to evolve in the absence of the KSW. This is consistent with our above  
analysis. There are evidences of this happened in the past, supporting this conclusion can be found in previous studies. For  
example, previous studies reported the occurrence of Hypoxia hypoxia occurred in the coastal area of Region II defined by us  
to south of the Changjiang estuary in August of 1959, 1976-85, 1981, 1999, 2002 and 2006; June of 2003; and September  
and October of 2006 (Table 1). Among these years, in 2006 hypoxia was maintained for three months while the KSW  
intruded at a southern location (Zou et al., 2008; Zhou et al., 2010; Wang et al., 2012); and in August 1959 hypoxia occurred  
995 in the northern end of the canyon where bottom salinity was 33.0 (Liu et al., 2012). No input of DO rich water from  
upstream led to the generation of hypoxia in this sub-region. For the rest other hypoxia cases, there was insufficient  
hydrological data to identify the locations of the KSW intrusion.

#### 1000 4.3. Bottom DO, CDW spreading and stratification in the northern sub-region

In the northern sub-region, the low oxygen centers were located where stratification was strong, and the pattern of  
hypoxia was influenced by the extension of the CDW.

1005 In June 2012, both strong stratification and relative low oxygen occurred in the western part of the Changjiang Bank  
(Figs. 3a, 5a); and till August, strong stratification was maintained and DO decreased to less than  $3.0 \text{ mg L}^{-1}$  (Figs. 3b, 5b).  
The CDW veered northeastward substantially (Fig. 7b), and below it a salinity front was produced as the TWC encountered  
the coastal fresh water (Fig. 6b). To the east of salinity front, there existed a tidal front (Fig. 8b). The DO rich YSW was  
transported to the eastern bank along this tidal front. Due to the lack of DO replenishment, the low oxygen area to the north  
of salinity front in the western bank developed into hypoxia (Fig. 3b). In October, the CDW switched back to flowing  
southward along the coast of Zhejiang. As stratification disappeared ( $N^2 < 10^{-6} \text{ s}^{-2}$ ), bottom DO increased to  $7.0 \text{ mg L}^{-1}$  (Figs.  
3e, 5e).

1010 In summer of 2013, the low oxygen center and hypoxia in the bank all showed correspondence with strong stratification  
( $N^2 > 10^{-2.0} \text{ s}^{-2}$ ) (Fig. 3 and Fig. 5). In July, the CDW expanded eastward, covering a zone spanning from the Changjiang  
estuary to Jeju Island. This facilitated the formation of a large low oxygen area with  $\text{DO} < 3.0 \text{ mg L}^{-1}$  over the whole bank  
under strong stratification (Figs. 3f, 5f, 7f). In the meanwhile, the KSW and the YSW along the tidal front relieved the  
hypoxia in the southern and eastern bank, respectively (Figs. 6f, 8f). Hence, hypoxia events only happened in the western  
1015 bank without DO supplement (Fig. 3f). In August, the KSW did not approach the mouth of the Changjiang River, but  
retreated southward (Fig. 6g). Meanwhile, the northward migration of the tidal front (Fig. 8g) limited the DO replenishment  
by the YSW. As a consequence, a sever hypoxia evolved in the area with low oxygen and sustained stratification (Fig. 3g, 5g  
and Table 3). In September, over the Changjiang Bank the CDW shrunk, stratification was broken almost everywhere (Figs.  
5h, 7h), and DO increased accordingly (Fig. 3h and Table 3). At the outer edge of the bank, however, stratification ( $N^2 > 10^{-2.0}$   
1020  $\text{ s}^{-2}$ ) was still present because of the vertical temperature differences, low DO ( $< 3.0 \text{ mg L}^{-1}$ ) was maintained along the outer

带格式的: 缩进: 首行缩进: 0.28 英寸

edge (stations I4, I5 and K6), and hypoxia occurred at the northeastern location (station I5).

The bottom DO concentration was in negative correlation with the strength of stratification over the Changjiang Bank (Fig. 9b). A regression relationship was obtained as  $DO = -1.67 \times \text{Log}_{10} N^2 + 0.43$ , with  $r = -0.67$  (significant at the 0.05 confidence level). Values of DO were always larger than  $4.0 \text{ mg L}^{-1}$  when stratification was very weak ( $N^2 < 10^{-3.0} \text{ s}^{-2}$ ). Hypoxia only happened under strong stratification, though high DO concentration could also exist under the same situation. Thus, stratification is a necessary condition for hypoxia formation over the bank.

In summer, the CDW will turn onto the bank but the direction of its extension may vary. For instance, the CDW spread northward in June 2012, and eastward in July 2013. The largest values of  $N^2$  were reached when the CDW lay over salty waters. Overall, hypoxia usually formed in the northwestern Changjiang Bank when the CDW extended northwestward, and in the eastern part when the CDW spread eastward substantially.

#### 4.4. An inter-comparison with hypoxia development between the water adjacent to the Changjiang estuary and the hypoxia in the Gulf of Mexico

Worldwide, the frequent occurrence of hypoxia ~~has been~~ is related to eutrophication (Conley et al., 2009). For the Gulf of Mexico, a statistical model for hypoxia prediction has been established based on nutrient loads from Mississippi River (Turner et al., 2006). ~~The interannual variation of the extent of hypoxia waters has a strong correlation with the volume of river discharge in the northern Gulf of Mexico in spring and summer (Rabouille et al., 2008). For Chesapeake Bay, the prediction of hypoxia volume is related to river runoff (Scully, 2010).~~ However, for waters adjacent to the Changjiang estuary, hypoxia can be influenced by many complicated factors. Here hypoxia is not directly related to runoff from river. In summer of 2006 the runoff was extremely low (Fig. 4011) but severe hypoxia occurred (Zou et al., 2008; Zhou et al., 2010; Wang et al., 2012). In summer of 2012 the runoff was among the highest in the recent decade but only a small area of hypoxia existed in August (Figs. 3a-c and Fig. 4011). Compared with 2012, in 2013 the runoff was ~~lower by far more less~~ but hypoxia occupied extremely large areas and sustained much longer (Figs. 3d-h and Fig. 4011). Clearly, the area or volume of hypoxia adjacent to the Changjiang estuary cannot be predicted based on river runoff.

Over the Texas-Louisiana shelf in the northern Gulf of Mexico, the formation and destruction of hypoxia is primarily a local vertical process, and the biological processes are responsible for ~~producing the variation of~~ hypoxia ~~change~~ from east to west (Hetland and DiMarco, 2008; Bianchi et al., 2010). Hypoxia is predominantly caused by water column respiration in the eastern region with steep shelf break, and by benthic respiration over the wide shelf to the west. Similarly, the hypoxia area adjacent to the Changjiang estuary can be divided into an area on the wide bank (~~Region I~~) and an area with steep slope (~~in Region II~~) according to bathymetry. Over the Changjiang Bank, low-oxygen is related to the presence of the CDW, while the CDW's position is influenced by the TWC (Wei et al., 2015a). Strong tidal mixing and monsoon may both induce the detachment of freshwater from the CDW (Xuan et al., 2012). This results in stronger changes of the river plume on the Changjiang Bank, compared with that on the west part of the Texas-Louisiana shelf where tides and wind are relatively weak.

In Region II of the ECS. Although the occurrence of low-oxygen centers near the steep slope to the south of the Changjiang estuary are constrained is related to bathymetric features, and the bottom DO in this region concentration is significantly influenced by the shelf circulation including the TWC (stratification) and shoreward intrusion of the Kuroshio (DO replenishment). The lateral transport and vertical processes both control the hypoxia adjacent to the Changjiang estuary.

Circulation conditions in the northern Gulf of Mexico and the ECS are distinctly different. The absence of strong offshore currents in the Mississippi margin results in a long residence time of the bottom water, in favor of biological respiration and hence frequent occurrence of hypoxia over a large spatial scale (Rabouille et al., 2008). Circulation in the ECS is strongly influenced by the presence of the strong western boundary current (Kuroshio). This results in a shorter residence time of the bottom water and hence less regular occurrence of hypoxia (Rabouille et al., 2008). Thus, in water adjacent to the Changjiang estuary, physical processes dominate over biological processes in driving the evolution of hypoxia. The prediction of low-oxygen needs requires information about salinity distribution evolution at the bottom to the south of the Changjiang estuary in Region II and at the surface over the Changjiang Bank in Region I, that defines the extensions of the KSW and the CDW, respectively.

## 5. Conclusions

As one of the major causes of ecological disasters in the coastal seas, especially in large river estuaries, hypoxia is becoming a global environmental issue and has attracted wide attention in recent decades. Base on new observational data from 10 cruises carried out in 2012 and 2013, the distribution of dissolved oxygen and evolution of hypoxia in waters adjacent to the Changjiang estuary are studied. The linkage of summer hypoxia with hydrodynamic conditions, including variations of water mass and stratification associated with circulation, is explored. The study area can be divided into the southern Region I (the Changjiang Bank) (south of Changjiang estuary) and northern Region II (the region to the south of the estuary) (the Changjiang Bank) sub regions. The mechanisms dominating the evolution of stratification and DO distribution are different in these two regions.

a) In Region I, i.e., over the Changjiang Bank, there is a high possibility that hypoxia occurs from July to September. The distribution of bottom DO corresponds to the intensity of stratification, the two being in negative correlation according to  $DO = -1.7 \times \log_{10}(N^2) + 0.4$ . Hypoxia exists only when stratification is strong, while DO is larger than  $4.0 \text{ mg L}^{-1}$  when stratification is weak ( $N^2 < 10^{-3.0} \text{ s}^{-2}$ ). Over the bank, the appearance of low-oxygen areas is mostly related to the spreading of the Changjiang Diluted Water. The combination of the coastal current (SBCC in Fig.1, northward in summer) and tidal front restrains DO replenishment from surrounding waters. Therefore, under the condition of sustained stratification, low-oxygen tends to evolve into hypoxia. Generally, the coastal current transports the Yellow Sea Water to the Changjiang Bank after the transition of monsoon in autumn, when stratification has already disappeared. Thus, the inflow of the YSW may play a minor role in the relief of summer hypoxia over the bank.

ab) In the southern sub-region Region II, a confluent area of coastal current and the Taiwan Warm Current near the 30-

带格式的: 上标

1085 50 m isobaths is where a low-oxygen center usually exists, and hypoxia may occur from June to October accompanied by  
strong stratification. Associated with bathymetric feature, salinity fronts exist throughout of the year in the northern end and  
block the DO exchange with water to the north. Thus DO-rich water lateral transportation is mainly comes from the south.  
The Kuroshio Subsurface Water ( $S > 34.5$ ) carried by the inner-near-shore branch of the TWC can substantially affect the  
bottom DO concentration in this region. Hypoxia is difficult to form if the KSW appears early in the middle shelf of the ECS  
1090 and intrudes further northward in summer. In this region, hypoxia does not occur at locations with bottom  $S > 34.5$ ; and when  
hypoxia does occur, there must be bottom  $S < 34.5$ .

~~b) In the northern sub-region, i.e. over the Changjiang Bank, there is a high possibility that hypoxia occurs from July to  
September. The distribution of bottom DO corresponds to the intensity of stratification, the two being in negative correlation  
with a regression relationship of  $DO = -1.67 \times \text{Log}_{10} A^2 + 0.43$ . DO is larger than  $4.0 \text{ mg L}^{-1}$  when stratification is weak ( $A^2$   
1095  $< 10^{2.0} \text{ s}^{-2}$ ). Over the bank, low oxygen area is mostly related to the CDW spreading. The combination of the Subei coastal  
current (northward in summer), tidal front of the YS and the bathymetry of the bank restrains DO replenishment from  
surrounding waters. Under the condition of sustained stratification, a low oxygen center may involve into hypoxia. Generally,  
the coastal current transports the YSW to the Changjiang Bank after the transition of monsoon in autumn, and in the  
meanwhile stratification has already disappeared. Thus, water from the YS may play a minor role in the relief of hypoxia in  
1100 summer.~~

In summary, based on new observations in 2012 and 2013, especially in 2013 with monthly data from May to  
September, it is evident that hypoxia in waters adjacent to the Changjiang estuary is substantially influenced by shelf  
circulation, including the CDW plume, the TWC and the KSW intrusion. The hypoxia evolution in 2013 was distinctly  
different from that in 2006 and 1958-1959. Due to the lack of monthly observations covering the same region in different  
1105 years, credible model simulations of inter-annual variations of hydrodynamic conditions are needed for further investigating  
the linkage of hypoxia with the KSW intrusion and the CDW spreading. We hope that combining analyses of observational  
data and modelling results shall eventually lead to better prediction of the spatial and temporal variations of hypoxia. It is  
hopeful that the prediction of hypoxia can be made according to the evolution of surface and bottom salinity.

#### Acknowledgements

1110 This study was supported by the National Basic Research Program of China (Grant No.2011CB403606 & 2010CB428904)  
and the National Natural Science Foundation of China (NSFC, Grant No.41376112). Liang Zhao was funded by NSFC under  
Grant No. 41276016 and the Strategic Priority Research Program of the Chinese Academy of Sciences (XDA11020305). Dr.  
Youyu Lu is appreciated for helpful discussions.

#### References



Bianchi, T. S., DiMarco, S. F., Cowan Jr, J. H., Hetland, R. D., Chapman, P. J., Day, W., and Allison, M. A.: The science of hypoxia in the Northern Gulf of Mexico: a review, *Sci. of the Total Environ.*, 408, 1471-1484, doi:10.1016/j.scitotenv.2009.11.047, 2010.

1120 Chen, C. C., Gong, G. C., and Shiah, F. K.: Hypoxia in the East China Sea: One of the largest coastal low-oxygen areas in the world, *Mar. Environ. Res.*, 64, 399-408, doi:10.1016/j.marenvres.2007.01.007, 2007.

Chen, J. Y., Chen, X. L., and Yang, Q. L.: Report of Comprehensive Survey on Resources in Coastal Zone of Shanghai, Shanghai Science and Technology Press, Shanghai, China, 390 pp, 19981988. (in Chinese)

Conley, D. J., Carstensen, J., Vaquer-Sunyer, R., and Duarte, C. M.: Ecosystem thresholds with hypoxia, *Hydrobiologia*, 629, 21-29, doi:10.1007/s10750-009-9764-2, 2009.

1125 Diaz, R. J., and Rosenberg, R.: Spreading dead zones and consequences for marine ecosystems, *Science*, 321, 926-929, doi:10.1126/science.1156401, 2008.

Editorial Board for Marine Atlas: Marine Atlas of Bohai Sea, Yellow Sea, East China Sea: Hydrology, China Ocean Press, Beijing, 1992, (in Chinese).

1130 Feng, Y., DiMarco, S. F., and Jackson, G. A.: Relative role of wind forcing and riverine nutrient input on the extent of hypoxia in the northern Gulf of Mexico, *Geophys. Res. Lett.*, 39, L09601, doi:10.1029/2012GL051192, 2012.

Gu, H. K.: The maximum value of dissolved oxygen in its vertical distribution in Yellow Sea, *Acta Oceanol. Sin.*, 2, 70-80, 1980. (in Chinese, with English Abstract.)

Hetland, R., and DiMarco, S.: How does the character of oxygen demand control the structure of hypoxia on the Texas–Louisiana continental shelf? *J. Mar. Syst.*, 70, 49-62, doi:10.1016/j.jmarsys.2007.03.002, 2008.

1135 Li, D. J., Zhang, J., Huang, D. J., Wu, Y., and Liang, J.: Oxygen depletion off the Changjiang (Yangtze River) estuary. *Science in China (Series D)*, 32, 686-694, 2002.

Li, H. L., Chen, J. F., Lu, Y., Jin, H. Y., Wang, K., and Zhang, H. S.: Seasonal variation of DO and formation mechanism of bottom water hypoxia of Changjiang River Estuary, *J. Mar. Sci.*, 29, 78-87, doi:10.3969/j.issn.1001-909X.2011.03.010, 2011.

1140 Limeburner, R., Beardsley, R. C., and Zhao J. S.: Water masses and circulation in the East China Sea, International symposium on sedimentation on the continental shelf, with special reference to the East China Sea, China Ocean Press, Beijing, China, 285-294, 1983.

Liu, H. X., Li, D. J., Gao, L., Wang, W. W., and Chen W. Q.: Study on main influence factors of formation and deterioration of summer hypoxia off the Yangtze River Estuary, *Adv. in Mar. Sci.*, 30, 186-197, 2012. (in Chinese, with English

带格式的: 字体: 10 磅, 字体颜色: 自定义颜色 (RGB(0,0,10))

带格式的: 字体: 10 磅, 字体颜色: 自定义颜色 (RGB(0,0,10))

带格式的: 左, 孤行控制, 断字, 不调整西文与中文之间的空格, 不调整中文和数字之间的空格

带格式的: 字体: 10 磅, 字体颜色: 自定义颜色 (RGB(0,0,10))

带格式的: 字体: 10 磅, 字体颜色: 自定义颜色 (RGB(0,0,10))

1145 Abstract.)

Liu, Z. L., and Hu, D. X.: Preliminary study on the Huanghai Sea coastal current and its relationship with local wind in summer, *Acta Oceanol. Sin.*, 31, 1-7, 2009. (in Chinese, with English Abstract.)

[Mao, H. L., Ren, Y. W., and Sun, G. D.: A preliminary study on the hydrographic characteristics and water types in summer in the Southern Yellow Sea and the East China Sea \(28°-37°N, \*Studia Marina Sinica\*, 1, 23-77, 1964. \(in Chinese\)](#)

1150 [Pan, Y. Q., Su, J. L., and Su, Y. F.: Seasonal hydrographic characteristics in the Southern East China Sea, Selected papers of investigation and study on the Kuroshio current \(Five\), Beijing: Ocean Press, 186-200, 1993. \(in Chinese, with English Abstract.\)](#)

1155 Rabouille, C., Conley, D. J., Dai, M. H., Cai, W. J., Chen, C. T. A., Lansard, B., and McKee, B.: Comparison of hypoxia among four river-dominated ocean margins: The Changjiang (Yangtze), Mississippi, Pearl, and Rhone rivers, *Cont. Shelf Res.*, 28, 1527-1537, doi:10.1016/j.csr.2008.01.020, 2008.

~~[Scully, M. E.: The importance of climate variability to wind driven modulation of hypoxia in Chesapeake Bay, \*J. Phys. Oceanogr.\*, 40, 1435-1440, doi:10.1175/2010JPO4321.1, 2010.](#)~~

1160 Shi, X. Y., Lu, R., Zhang, C. S., and Wang, X. L.: Distribution and main influence factors process of dissolved oxygen in the adjacent area of the Changjiang estuary in autumn, *Periodical of Ocean Univ. of China*, 36, 287-290, 2006a. (in Chinese, with English Abstract.)

Shi, J. Z., Zhang, S. Y., and Hamilton, L. J.: Bottom fine sediment boundary layer and transport processes at the mouth of the Changjiang estuary, China. *J. Hydrology*, 327, 276-288, doi:10.1016/j.jhydrol.2005.11.039, 2006b.

Su, J. L.: A review of circulation dynamics of the coastal oceans near China, *Acta Oceanol. Sin.*, 23, 1-16, 2001. (in Chinese, with English Abstract.)

1165 Su, Y. S., Li, F. Q., and Wang, F. Q.: Water type distribution and water regime division in the Bohai, Yellow and East China Seas, *Acta Oceanol. Sin.*, 18, 1-7, 1996. (in Chinese, with English Abstract.)

[The State Bureau of Technical Supervision: The specification for oceanographic survey & oceanographic survey data processing, 1992. \(in Chinese\)](#)

1170 Tian, R. C., Hu, F. X., and Martin, J. M.: Summer nutrient fronts in the Changjiang (Yangtze River) estuary, *Estuarine, Coastal and Shelf Sci.*, 37, 27-41, doi:10.1006/ecss.1993.1039, 1993.

Turner, R. E., Rabalais, N. N., and Justic, D.: Predicting summer hypoxia in the northern Gulf of Mexico: Riverine N, P, and Si loading, *Mar. Pollution Bulletin*, 52, 139-148, doi:10.1016/j.marpolbul.2005.08.012, 2006.

- Wang, B. D., and Wang, X. L.: Chemical hydrography of coastal upwelling in the East China Sea, *Chinese J. Oceanol. and Limnol.*, 25, 16-26, doi:10.1007/s00343-007-0016-x, 2007.
- 1175 Wang, B. D.: Hydromorphological mechanisms leading to hypoxia off the Changjiang estuary, *Mar. Environ. Res.*, 67, 53-58, doi:10.1016/j.marenvres.2008.11.001, 2009.
- Wang, B. D., Wei, Q. S., Chen, J. F., and Xie, L. P.: Annual cycle of hypoxia off the Changjiang (Yangtze River) Estuary, *Mar. Environ. Res.*, 77, 1-5, doi:10.1016/j.marenvres.2011.12.007, 2012.
- Wei, H., He, Y. C., Li, Q. J., Liu, Z. Y., and Wang, H. T.: Summer hypoxia adjacent to the Changjiang estuary, *J. Mar. Syst.*, 1180 67, 292-303, doi:10.1016/j.jmarsys.2006.04.014, 2007.
- Wei, H., Luo, X. F., Zhao, Y. D., and Zhao, L.: Intraseasonal variation in the salinity of the Yellow and East China Seas in the summers of 2011, 2012, and 2013, *Hydrobiologia*, 754, 13-28, doi:10.1007/s10750-014-2133-9, 2015a.
- Wei, Q. S., Wang, B. D., Chen, J. F., Xia, C. S., Qu, D. P., and Xie, L. P.: Recognition on the forming-vanishing process and underlying mechanisms of the hypoxia off the Yangtze River estuary, *Sci. China: Earth Sci.*, 45(2), 187-206, doi: 1185 10.1007/s11430-014-5007-0, 2015b.
- Wei, Q. S., Zhan, R., Wei, X. H., Zang, J. Y., Wang, S. Q., and Wang, Z. X.: Distribution of dissolved oxygen and hypoxia characteristics in the northeast sea of the Yangtze estuary, *Adv. in Mar. Sci.*, 28, 32-40, 2010. (in Chinese, with English Abstract.)
- Wei, Q. S., Yu, Z. G., Xia, C. S., Zang, J. Y., Ran, X. B., and Zhang, X. L.: A preliminary analysis on the dynamic characteristics of the hypoxic zone adjacent to the Changjiang estuary in summer, *Acta Oceanol. Sin.*, 33, 100-109, 1190 2011. (in Chinese, with English Abstract.)
- Weng, X. C., and Wang, C. M.: A study on Taiwan Warm Current Water, *Mar. Sci.*, 9, 7-10, 1985. (in Chinese, with English Abstract.)
- Xu, S. M.: The distribution and environmental significance of redox sensitive elements off the Changjiang estuary hypoxia zone and its contiguous sea area, Ph.D. Thesis, Ocean University of China. Qingdao, China, unpublished, 2005. (in 1195 Chinese, with English Abstract.)
- Xuan, J. L., Huang, D. J., Zhou, F., Zhu, X. H., Fan X. P.: The role of wind on the detachment of low salinity water in the Changjiang estuary in summer, *J. Geophys. Res.*, 117, C10007, doi:10.1029/2012JC008121, 2012.
- Zhang, Y. Y., Zhang, J., Wu, Y., and Zhu, Z. Y.: Characteristics of dissolved oxygen and its affecting factors in the Yangtze 1200 Estuary, *Environ. Sci.*, 28, 1649-1654, 2007. (in Chinese, with English Abstract.)
- Zhang, Z. Q.: On maximum and minimum dissolved oxygen with bottom layer in Yellow Sea and northern east China Sea in

summer. *Bulletin of Mar. Sci.*, 9, 22-26, 1990. (in Chinese, with English Abstract.)

1205 Zhang, Z., Zhang, Z. F., Han, G. C., Wang, Y., Wang, L. J., and He, X.: Spatio-temporal variation, formation and transformation of the hypoxia area off the Yangtze River Estuary, *Mar. Environ. Sci.*, 31, 469-473, 2012. (in Chinese, with English Abstract.)

Zhao, B. R.: The frontal of the Huanghai Sea Cold Water Mass induced by tidal mixing, *Oceanol. et Limnol. Sin.*, 16, 451-460, 1985. (in Chinese, with English Abstract.)

Zhao, B. R., Ren, G. F., Cao, D. M., and Yang, Y. L.: Characteristics of the ecological environment in upwelling area adjacent to the Changjiang River Estuary, *Oceanol. et Limnol. Sin.*, 32, 327-333, 2001. (in Chinese, with English Abstract.)

1210 Zhou, F., Huang, D. J., Ni, X. B., Xuan, J. L., Zhang, J., and Zhu, K. X.: Hydrographic analysis on the multi-time scale variability of hypoxia adjacent to the Changjiang River Estuary, *Acta Oceanol. Sin.*, 17, 4728-4740, 2010. (in Chinese, with English Abstract.)

Zhu, J. R., Zhu, Z. Y., Lin, J., Wu, H., and Zhang, J.: Distribution of hypoxia and pycnocline off the Changjiang Estuary, China, *J. Mar. Sci.*, [http:// dx.doi.org/10.1016/j.jmarsys.2015.05.002](http://dx.doi.org/10.1016/j.jmarsys.2015.05.002), 2015.

1215 Zhu, Z.Y.: Hypoxia in the Changjiang estuary and its adjacent area-started with phytoplankton pigments, Ph.D. Thesis, East China Normal University, Shanghai, China, unpublished, 2007. (in Chinese, with English Abstract.)

Zou, J. J., Yang, G., Liu, J. H., Shi, X. F., and Fang, X. S.: Distribution characteristics of dissolved oxygen in the sea area adjacent to the Changjiang river in September, *Adv. in Mar. Sci.*, 26, 65-73, 2008. (in Chinese, with English Abstract.)

1220

**Tables and Figures:****Table 1.** Records of locations and values of minimum dissolved oxygen off the Changjiang estuary.

| Time            | Location  |          | Min. DO<br>value (mg L <sup>-1</sup> ) | References               |
|-----------------|-----------|----------|----------------------------------------|--------------------------|
|                 | Longitude | Latitude |                                        |                          |
| Aug., 1959      | 122°45'   | 31°15'   | 0.34                                   | Liu et al., 2012         |
| Aug., 1976–1985 | 123°00'   | 31°00'   | 0.80                                   | Zhang, 1990              |
| Aug., 1981      | 123°00'   | 30°50'   | 2.0                                    | Limeburner et al., 1983  |
| Aug., 1988      | 123°00'   | 30°50'   | 1.96                                   | Tian et al., 1993        |
| Aug., 1998      | 124°00'   | 32°10'   | 1.44                                   | Wang and Wang, 2007      |
| Aug., 1999      | 122°59'   | 30°51'   | 1.0                                    | Li et al., 2002          |
| Aug., 2002      | 122°29'   | 32°00'   | 1.73                                   | Shi et al., 2006a, 2006b |
|                 | 123°00'   | 31°00'   | 1.99                                   |                          |
| Jun., 2003      | 122°50'   | 30°50'   | ~1.0                                   | Xu, 2005                 |
| Aug., 2003      | 123°30'   | 31°30'   | 2.0                                    | Chen et al., 2007        |
| Sep., 2003      | 122°56'   | 30°49'   | 0.8                                    | Wei et al., 2007         |
|                 | 122°45'   | 31°55'   | <1.5                                   |                          |
| Aug., 2005      | 122°48'   | 32°18'   | 1.55                                   | Zhu et al., 2007         |
| Jul., 2006      | 122°23'   | 32°42'   | 1.36                                   | Wei et al., 2010         |
| Aug., 2006      | 122°55'   | 32°55'   | 1.0                                    | Zhou et al., 2010        |
|                 | 122°30'   | 29°12'   | <2                                     |                          |
| Sep., 2006      | 123°06'   | 30°09'   | 1.96                                   | Zou et al., 2008         |
| Oct., 2006      | 123°21'   | 30°05'   | 1.8                                    | Zhou et al., 2010        |
| Aug., 2012      | 122°41'   | 33°00'   | 1.0                                    | this study               |
| Jun., 2013      | 122°39'   | 29°50'   | 1.5                                    | this study               |
|                 | 122°52'   | 29°48'   | 1.6                                    |                          |
| Jul., 2013      | 122°19'   | 32°24'   | 1.7                                    | this study               |
|                 | 122°19'   | 32°03'   | 1.6                                    |                          |
|                 | 122°36'   | 31°54'   | 1.8                                    |                          |
|                 | 123°25'   | 32°10'   | 1.9                                    |                          |
| Aug., 2013      | 123°44'   | 33°00'   | 1.8                                    | this study               |
|                 | 123°01'   | 32°00'   | 1.9                                    |                          |
|                 | 123°32'   | 32°00'   | 1.8                                    |                          |
|                 | 124°28'   | 32°00'   | 1.3                                    |                          |
|                 | 124°46'   | 32°00'   | 1.2                                    |                          |
| Sep., 2013      | 123°58'   | 33°02'   | 1.1                                    | this study               |

**Table 2.** Information of cruises analyzed in this study.

| Cruise    | Sampling Date     | Number of Stations and Research Area     | Instrumentation               | Research Vessel      |
|-----------|-------------------|------------------------------------------|-------------------------------|----------------------|
| 201206    | 08-29 Jun.        | 54 stations<br>in the YECS <sup>a</sup>  | SBE 17 <i>plus</i><br>RBR620  | <i>Beidou</i>        |
| 201208    | 11-20 Aug.        | 42 stations<br>in the YECS               | SBE 17 <i>plus</i><br>RBR620  | <i>Beidou</i>        |
| 201210    | 09-26 Oct.        | 42 stations<br>in the YECS               | SBE 19 <i>plus</i><br>RBR620  | <i>Beidou</i>        |
| 201305-I  | 11-15 May         | 9 stations<br>in Subei Bank              | RBR620                        | <i>Suruyuyun288</i>  |
| 201305-II | 11-15 May         | 15 stations off<br>Zhejiang Coast        | SBE 911 <i>plus</i><br>RBR620 | <i>Zhepuyu 23012</i> |
| 201306    | 15-19 Jun.        | 48 stations<br>in the YECS               | SBE 911 <i>plus</i><br>RBR620 | <i>Beidou</i>        |
| 201307-I  | 16-22 Jul.        | 20 stations in the<br>Changjiang estuary | RBR620                        | <i>Runjiang1</i>     |
| 201307-II | 12 Jul. - 01 Aug. | 74 stations<br>in the YECS               | SBE 911 <i>plus</i><br>RBR620 | <i>Dongfanghong2</i> |
| 201308    | 13 Aug. - 02 Sep. | 63 stations<br>in the YECS               | SBE 17 <i>plus</i><br>RBR620  | <i>Beidou</i>        |

1225 <sup>a</sup> YECS: Yellow and East China Seas

**Table 3.** Averaged values of DO (in mg L<sup>-1</sup>) and the logarithm of the maximum squared buoyancy frequency (in s<sup>-2</sup>) in Region I from different monthly cruises. *N* denotes the number of samples.

带格式的: 行距: 1.5 倍行距

Regional mean temperature at the bottom ( $T_{\text{bottom}}$ : in  $^{\circ}\text{C}$ ), salinity in the surface ( $S_{\text{surface}}$ : in psu), salinity at the bottom ( $S_{\text{bottom}}$ : in psu), maximum squared buoyancy frequency at logarithmic scale ( $N^2_{\text{max}}$ : in  $\text{s}^{-2}$ ), dissolved oxygen concentration of bottom water (DO: in  $\text{mg L}^{-1}$ ) and the number (N) of samples in areas with frequent occurrence of hypoxia.

|        | Frequent hypoxia area           | $T_{\text{bottom}}$ | $S_{\text{surface}}$ | $S_{\text{bottom}}$ | $N^2_{\text{max}}$ | DO      | N  |
|--------|---------------------------------|---------------------|----------------------|---------------------|--------------------|---------|----|
| 201206 | I <sup>a</sup>                  | 18.9±1.6            | 31.5±3.2             | 34.9±0.7            | -2.1±0.2           | 5.2±0.8 | 14 |
| 201208 | I                               | 18.7±0.2            | 29.8±4.2             | 35.7±0.0            | -1.9±0.2           | 3.5±0.5 | 2  |
| 201210 | I                               | 23.0±0.9            | 30.4±3.9             | 31.9±1.7            | -2.5±0.6           | 5.3±1.7 | 5  |
| 201305 | I                               | 17.4±0.8            | 25.9±3.9             | 28.6±5.2            | -2.8±0.4           | 8.1±0.3 | 10 |
| 201306 | I                               | 19.1±1.1            | 28.7±4.2             | 33.9±0.8            | -2.0±0.3           | 2.7±0.7 | 11 |
| 201307 | I                               | 20.4±2.1            | 31.2±3.4             | 33.0±2.5            | -2.0±0.6           | 4.8±1.7 | 19 |
| 201308 | I                               | 10.0±1.4            | 31.3±3.8             | 34.2±0.4            | -2.3±0.3           | 3.6±0.8 | 7  |
| 201309 | I                               | 21.1±2.7            | 32.4±1.6             | 34.0±0.9            | -2.1±0.1           | 4.4±1.2 | 6  |
| 201206 | II <sup>b</sup>                 | 16.9±2.4            | 29.5±2.9             | 33.0±0.8            | -2.2±0.9           | 6.4±1.5 | 13 |
| 201208 | II                              | 20.5±3.9            | 28.1±5.2             | 33.6±1.9            | -1.9±0.4           | 3.7±1.4 | 11 |
| 201210 | II                              | 21.7±0.8            | 30.9±0.8             | 31.0±0.8            | -3.8±0.4           | 7.2±0.4 | 14 |
| 201305 | II                              | 15.2±1.2            | 27.2±4.2             | 31.7±1.1            | -2.7±0.9           | 8.3±0.7 | 14 |
| 201306 | II                              | 17.2±3.0            | 30.2±1.5             | 31.7±0.7            | -2.5±0.5           | 4.3±0.7 | 12 |
| 201307 | II                              | 20.5±2.5            | 29.6±1.5             | 31.9±1.1            | -1.7±0.2           | 2.8±0.8 | 11 |
|        | ( $S_{\text{surface}} > 26.0$ ) |                     |                      |                     |                    |         |    |
|        | II                              | 27.5±4.2            | 7.7±8.5              | 10.0±13.6           | -2.5±1.0           | 5.1±2.7 | 5  |
|        | ( $S_{\text{surface}} < 26.0$ ) |                     |                      |                     |                    |         |    |
| 201308 | II                              | 22.1±3.0            | 31.2±1.9             | 32.7±0.9            | -2.3±0.7           | 2.2±0.7 | 15 |
| 201309 | II                              | 23.6±2.4            | 31.6±2.3             | 32.9±1.0            | -2.9±0.8           | 5.0±2.0 | 15 |

<sup>a</sup>offshore waters of Zhejiang Province and submarine river canyon

<sup>b</sup>over the Changjiang Bank with water depth less than 50 m

| cruise | DO      | $N^2$    | N  |
|--------|---------|----------|----|
| 201206 | 6.5±1.6 | -2.3±0.9 | 12 |
| 201208 | 3.9±1.1 | -2.0±0.5 | 10 |
| 201210 | 7.1±0.4 | -3.9±0.3 | 11 |
| 201306 | 4.3±0.7 | -2.5±0.5 | 11 |
| 201307 | 2.6±0.6 | -1.8±0.3 | 16 |
| 201308 | 2.3±0.7 | -2.1±0.4 | 13 |

带格式表格

1235

---

201309

4.8±1.9

-2.8±0.8

14

---



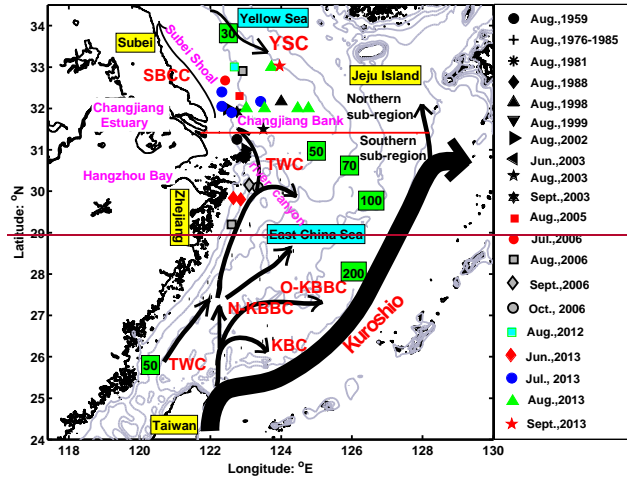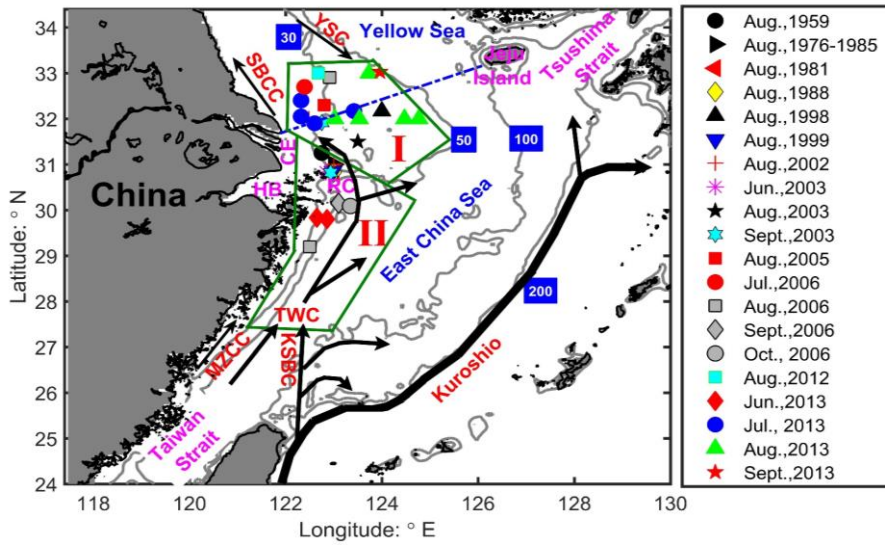

240 **Figure 1.** Topography and schematic map of summer circulation in the Yellow Sea and East China Sea. Black arrows denote

1245 circulation including the Yellow Sea Current (YSC), Subei Coastal Current (SBCC), Taiwan Warm Current (TWC), and Kuroshio intrusion (KBC: surface Kuroshio Branch Current; O-KBBC: offshore Kuroshio Bottom Branch Current; N-KBBC: Nearshore Kuroshio Bottom Branch Current, i.e. Kuroshio Subsurface Water). Contours in gray denote isobaths of 30, 50, 70, 100, and 200 m. Various symbols represent sampling stations of different cruises labelled in the right pane that observed the occurrence of hypoxia. Red line marks the boundary between southern and northern sub-regions. Sea.

1250 Figure 1. Topography and schematic map of summer circulation in the Yellow Sea and East China Sea. Black arrows denote circulation including the Yellow Sea Current (YSC), Subei Coastal Current (SBCC), Minzhe Coastal Current (MZCC), Taiwan Warm Current (TWC), Kuroshio Subsurface Branch Current (KSBC) and Kuroshio. CE, HB and RC are short for the Changjiang estuary, Hangzhou Bay and submarine river canyon, respectively. Various symbols represent sampling stations of different cruises labelled in the right pane that observed the occurrence of hypoxia. Polygons outlined by green lines are I. Changjiang Bank and II. the region to the south of the Changjiang estuary. The Contours in gray denote isobaths of 30, 50, 100, and 200 m. Dotted blue line marks the boundary between the Yellow sea and the East China Sea.

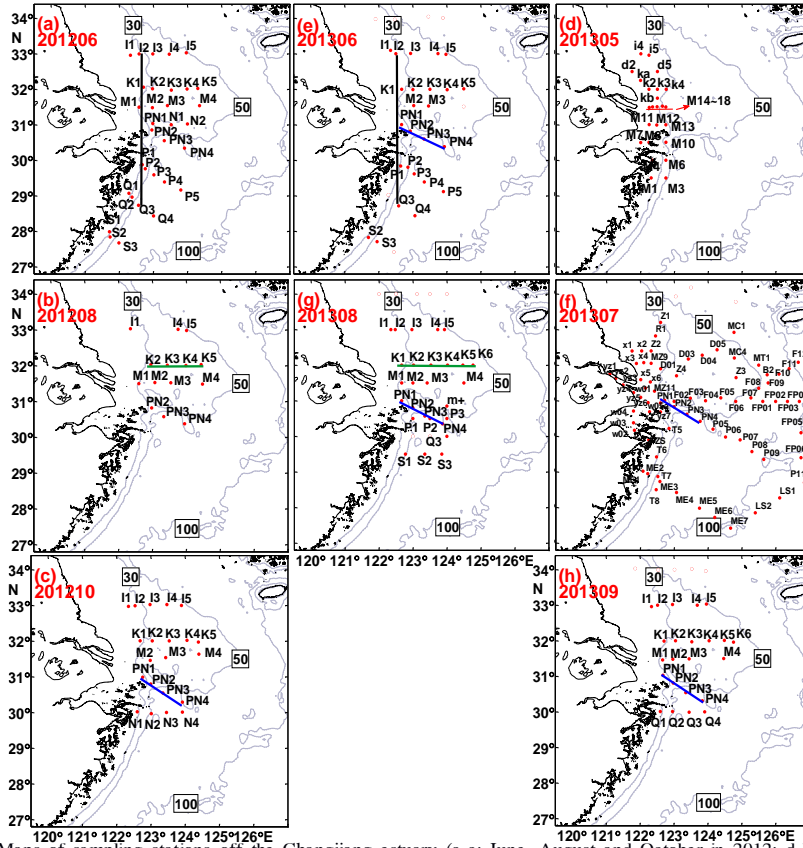

**Figure 2.** Maps of sampling stations off the Changjiang estuary (a-c: June, August and October in 2012; d-h: May to September in 2013). The layout is designed to ease comparison between 2012 and 2013 for June and August. Black, green and blue bold lines denote section at 122.5°E and section K in Fig. 4, and section PN in Fig. 5, respectively.

1260

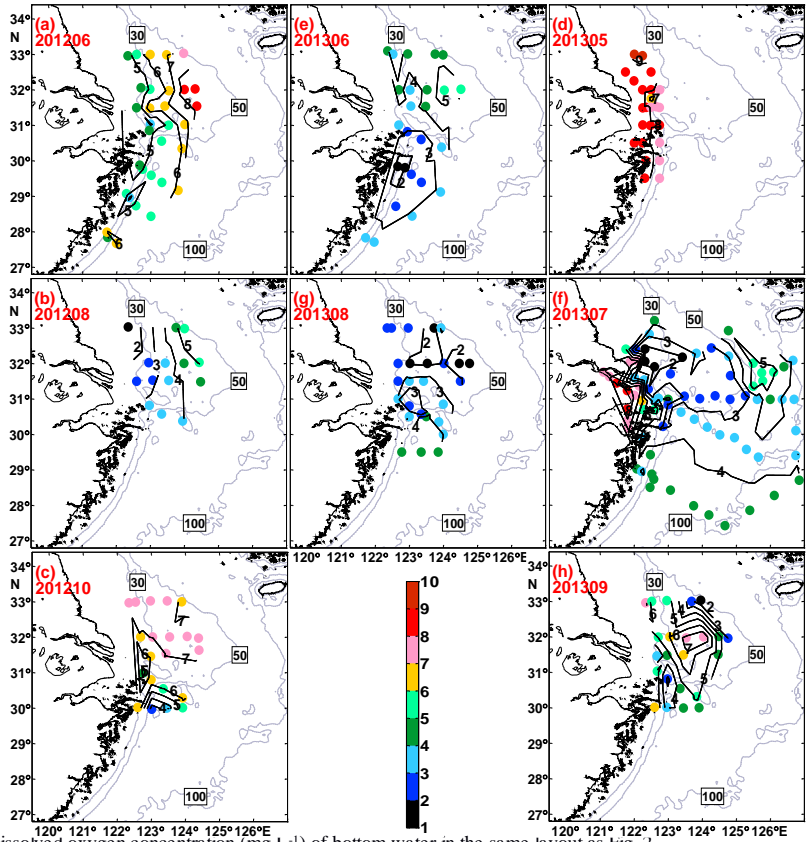

Figure 3. Dissolved oxygen concentration ( $\text{mg L}^{-1}$ ) of bottom water in the same layout as Fig. 2.

1265

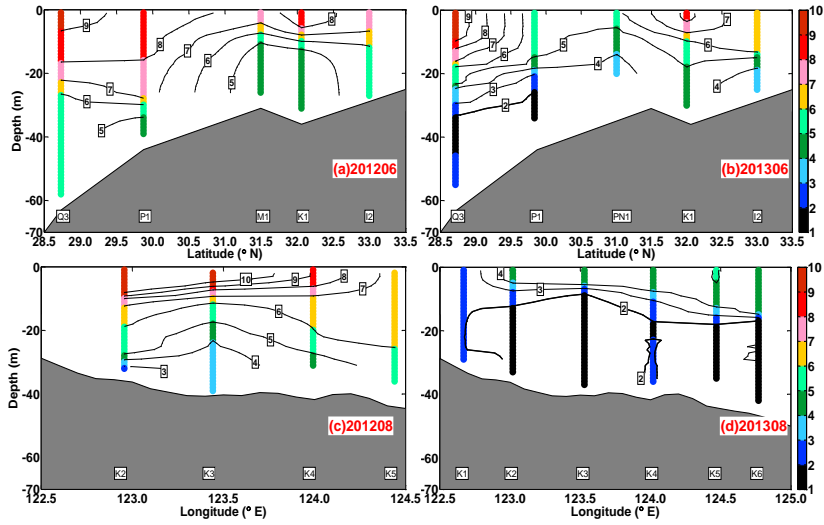

**Figure 4.** Dissolved oxygen concentration ( $\text{mg L}^{-1}$ ) along section at  $122.5^\circ\text{E}$  (a: June 2012; b: June 2013) and section K (c: August 2012; d: August 2013).

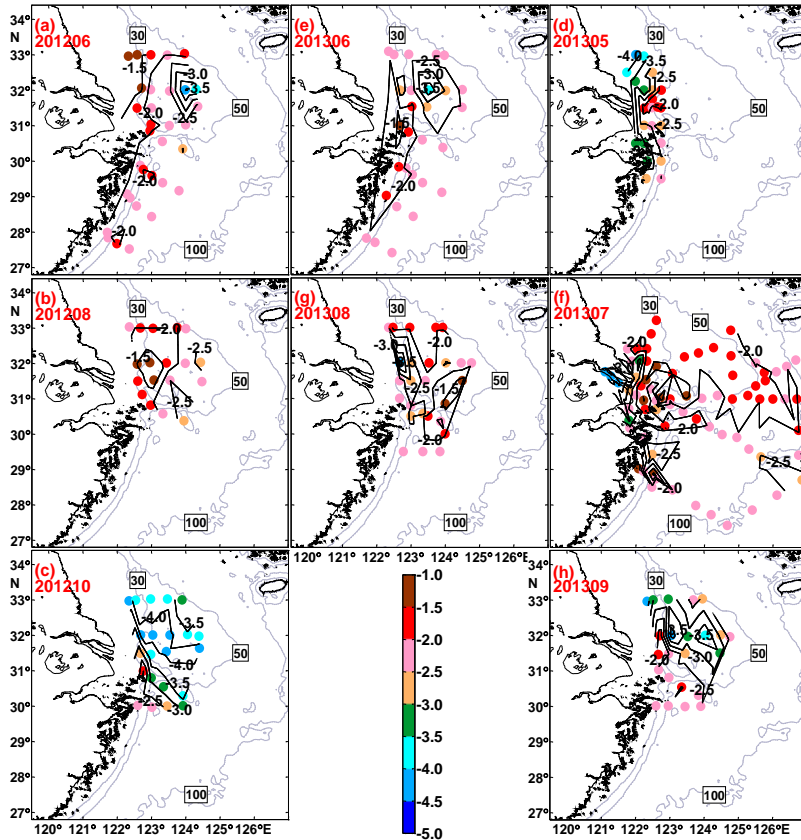

Figure 5. Same as Fig. 3 except for maximum squared buoyancy frequency at logarithmic scale ( $N^2: s^{-2}$ ).

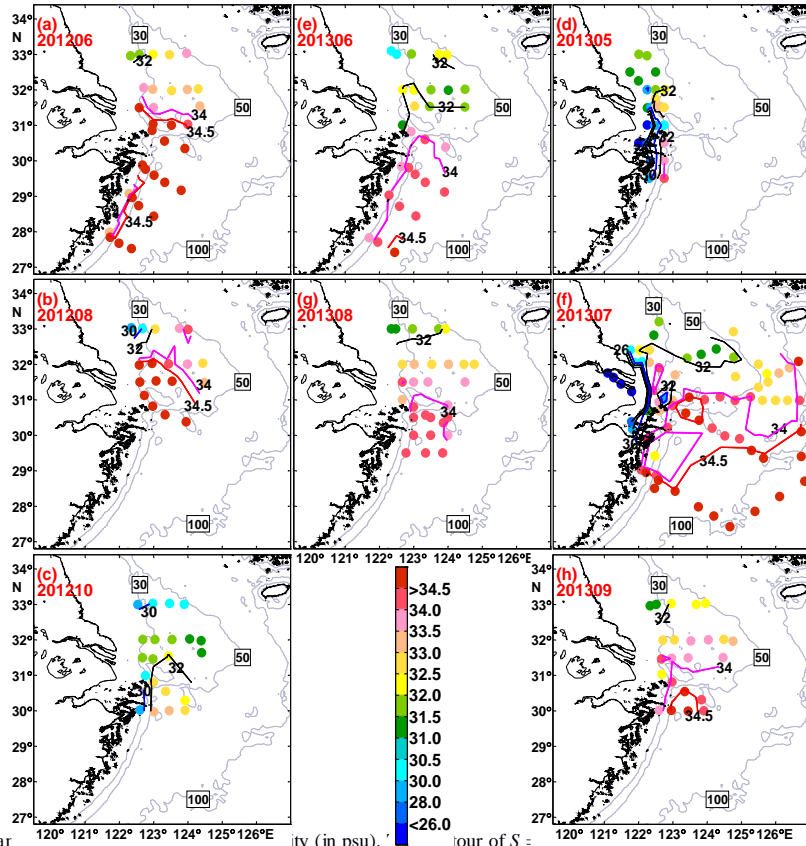

Figure 6. Salinity (in psu) on the surface of the East China Sea. The color scale shows the salinity ( $S$ ) in psu. The contours of  $S = 30$ ,  $50$ , and  $100$  m are shown. The color scale of  $S$  is:  $S > 34.5$  (dark red),  $34.0$  (red),  $33.5$  (orange),  $33.0$  (yellow),  $32.5$  (light green),  $32.0$  (green),  $31.5$  (light blue),  $31.0$  (blue),  $30.5$  (cyan),  $30.0$  (dark blue), and  $< 26.0$  (black). The magenta lines represent the Taiwan Warm Current, and the red lines represent the Kuroshio Subsurface Water. The yellow and green areas represent the Changjiang Diluted Water.

1275

1280

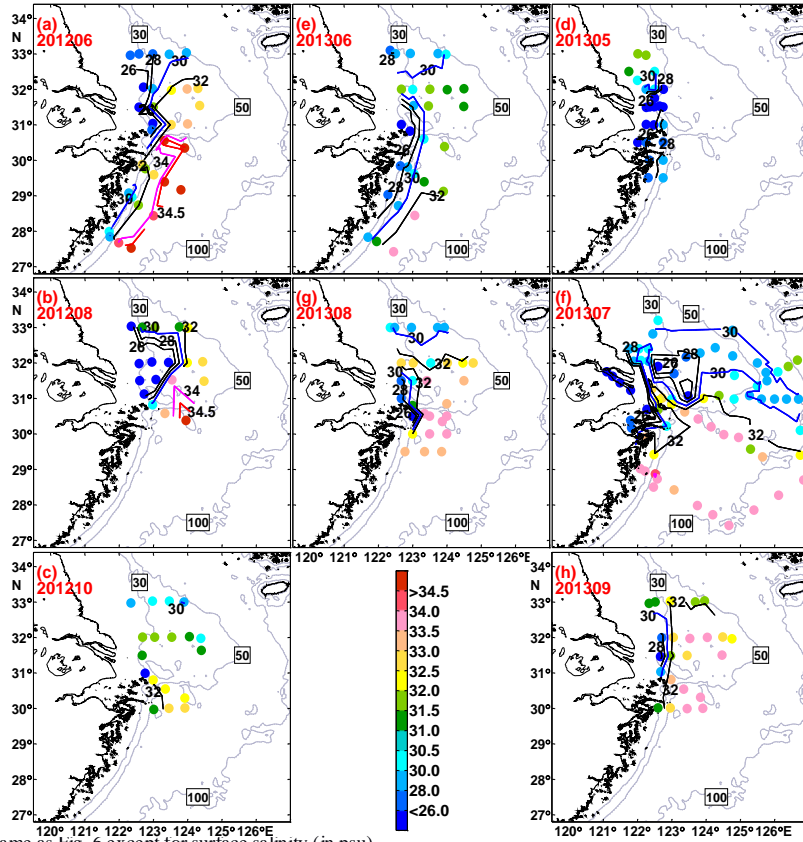

Figure 7. Same as Fig. 6 except for surface salinity (in psu).



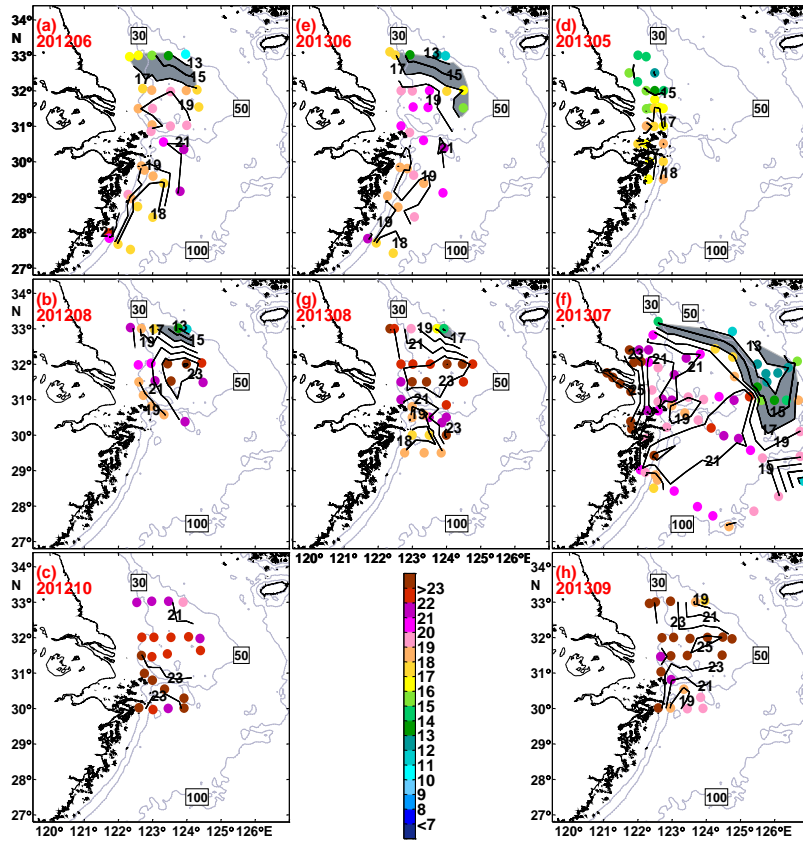

**Figure 8.** Same as Fig. 3 except for bottom temperature (in  $^{\circ}\text{C}$ ). The **18 $^{\circ}\text{C}$**  contour characterizes the Kuroshio-Subsurface Water and is emphasized in bold. Shading area denotes frontal zone.

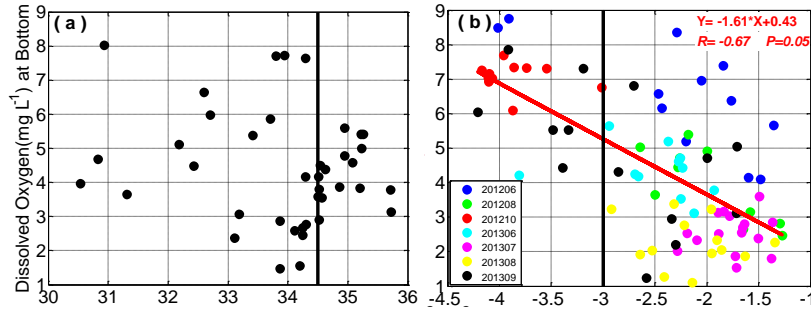

Figure 9. Dissolved oxygen concentration (in  $\text{mg L}^{-1}$ ) of bottom water versus (a) bottom salinity (in psu) in the southern sub region, and (b) maximum squared buoyancy frequency at logarithmic scale ( $\text{N}^2; \text{s}^{-2}$ ) in the northern sub region.

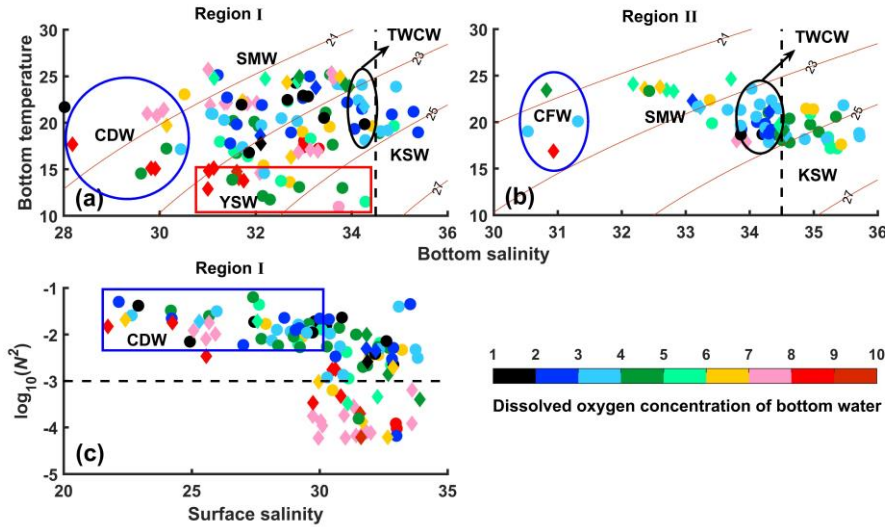

Figure 9. Variations of DO (in  $\text{mg L}^{-1}$ ) corresponding to bottom salinity (in psu) and bottom temperature ( $^{\circ}\text{C}$ ) for (a) Region I and (b) Region II, and (c) corresponding to surface salinity (in psu) and the logarithm of maximum squared buoyancy frequency ( $\text{N}^2$ ; in  $\text{s}^{-2}$ ) for Region I. Dots stand for samplings collected in summer (June to August); diamonds in spring (May) and autumn (September and October). TWCW, KSW, SMW, YSW, CDW and CW are abbreviations of Taiwan Warm

带格式的: 居中

带格式的: 居中, 行距: 单倍行距

带格式的: 缩进: 首行缩进: 0.5 英寸

带格式的: 行距: 1.5 倍行距

Current Water, Kuroshio Subsurface Water, Shelf Mixed Water, Yellow Sea Water, Changjiang Diluted Water and Coastal Water.

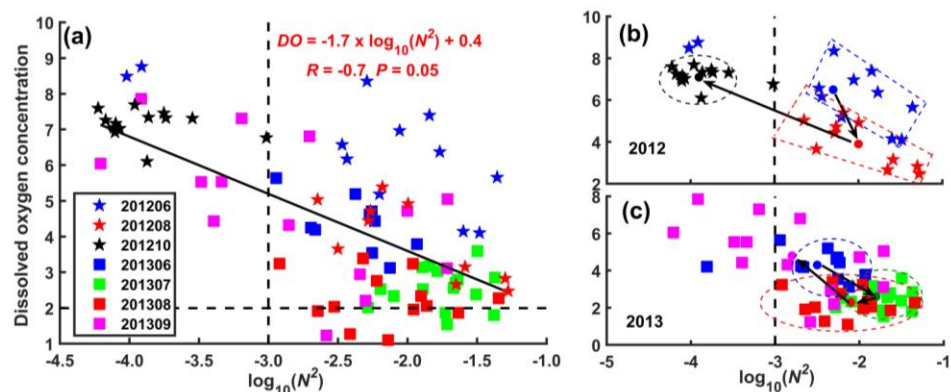

Figure 10. The distribution of DO (in  $\text{mg L}^{-1}$ ) versus  $\log_{10}(N^2)$  in Region I with water depth greater than 30 m for (a) all samplings in 2012 and 2013 and separately in (b) 2012 and (c) 2013. Color symbols denote samplings collected during different monthly cruises. The black solid line in (a) denotes the linear regression relationship. In (b) and (c), black arrows illustrate the seasonal evolution of DO in 2012 and 2013, respectively; colored dots denote the averaged values of DO and  $N^2$  of different months (also listed in Table 3).

带格式的: 字体颜色: 黑色

带格式的: 居中, 行距: 1.5 倍行距

带格式的: 字体: 11 磅

带格式的: 行距: 1.5 倍行距

带格式的: 居中, 行距: 单倍行距



**Figure 4011.** Monthly discharge of the Changjiang River in 2000–2013, averaged from daily monitoring data collected at the Datong Hydrologic Station (<http://yu-zhu.vicp.net/>).
